# Supplementary material for: Metal-Free Synthesis of Carbamoylated Chroman-4-Ones via Cascade Radical Annulation of 2-(Allyloxy)arylaldehydes with Oxamic Acids
Source: MDPI journal article supplement (doi:10.3390/molecules27207049), 2022-10-19
Supplement: s1 [file s1]

# **Metal Free Synthesis of Carbamoylated Chroman-4-Ones via Cascade Radical Annulation of 2-(Allyloxy)arylaldehydes with Oxamic Acids**

Long-Yong Xie <sup>1\*</sup>, Sha Peng <sup>1</sup>, Li-Hua Yang <sup>1</sup>, and Xiao-Wen Liu <sup>1\*</sup>

*College of Chemistry and Bioengineering, Hunan University of Science and Engineering, Yongzhou  
425100, China*

*E-mail: xielongyong@huse.edu.cn*

# <sup>1</sup>H and <sup>13</sup>C NMR spectra of products

## 2-(4-oxochroman-3-yl)-*N*-phenylacetamide (3aa)

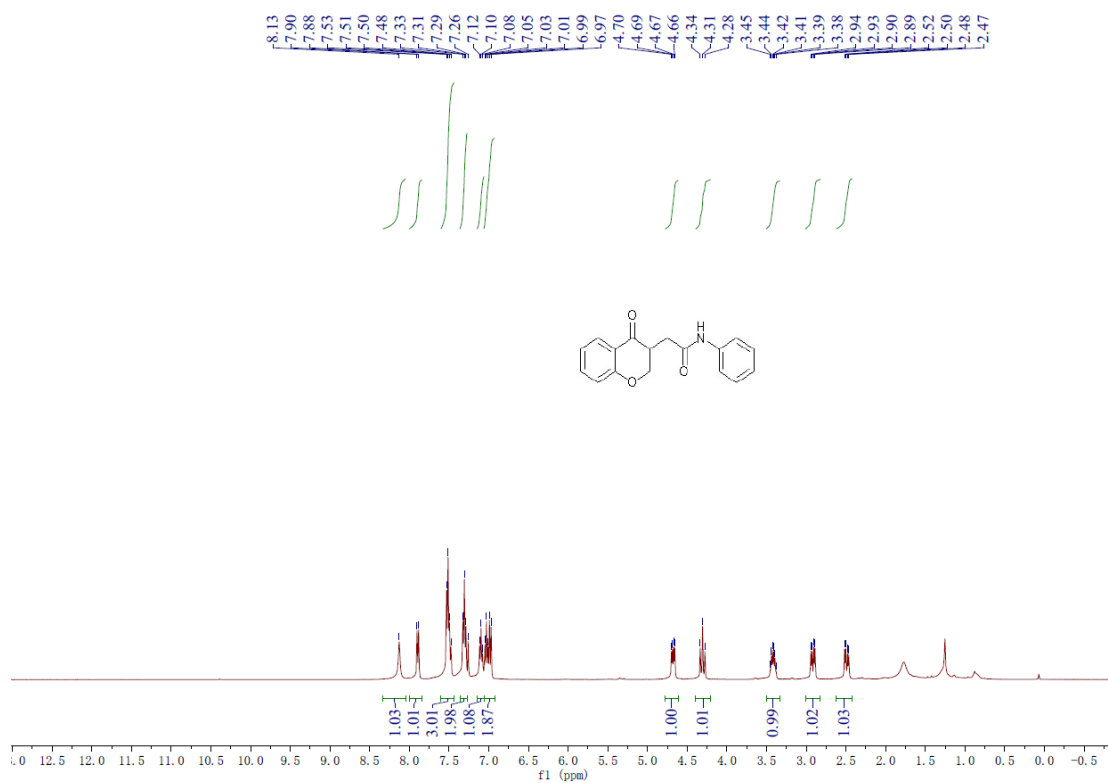

<sup>1</sup>H spectra of 3aa

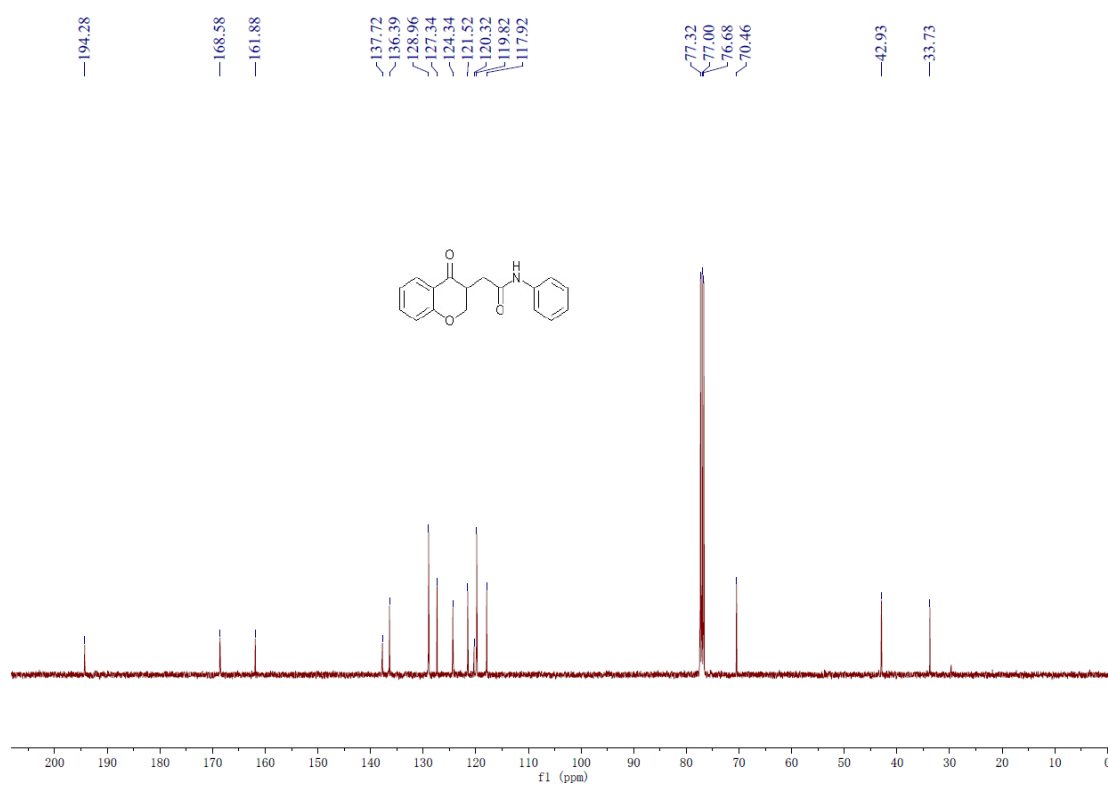

<sup>13</sup>C spectra of 3aa

**2-(8-methyl-4-oxochroman-3-yl)-N-phenylacetamide (3ba)**

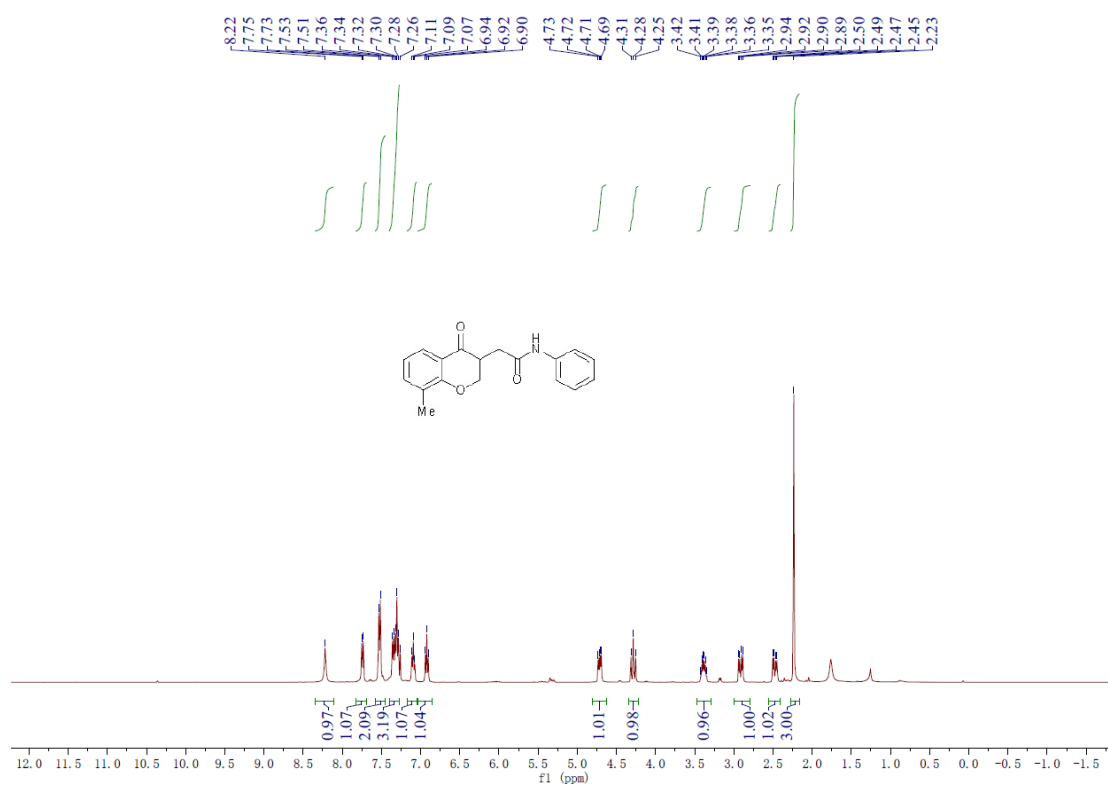

**<sup>1</sup>H spectra of 3ba**

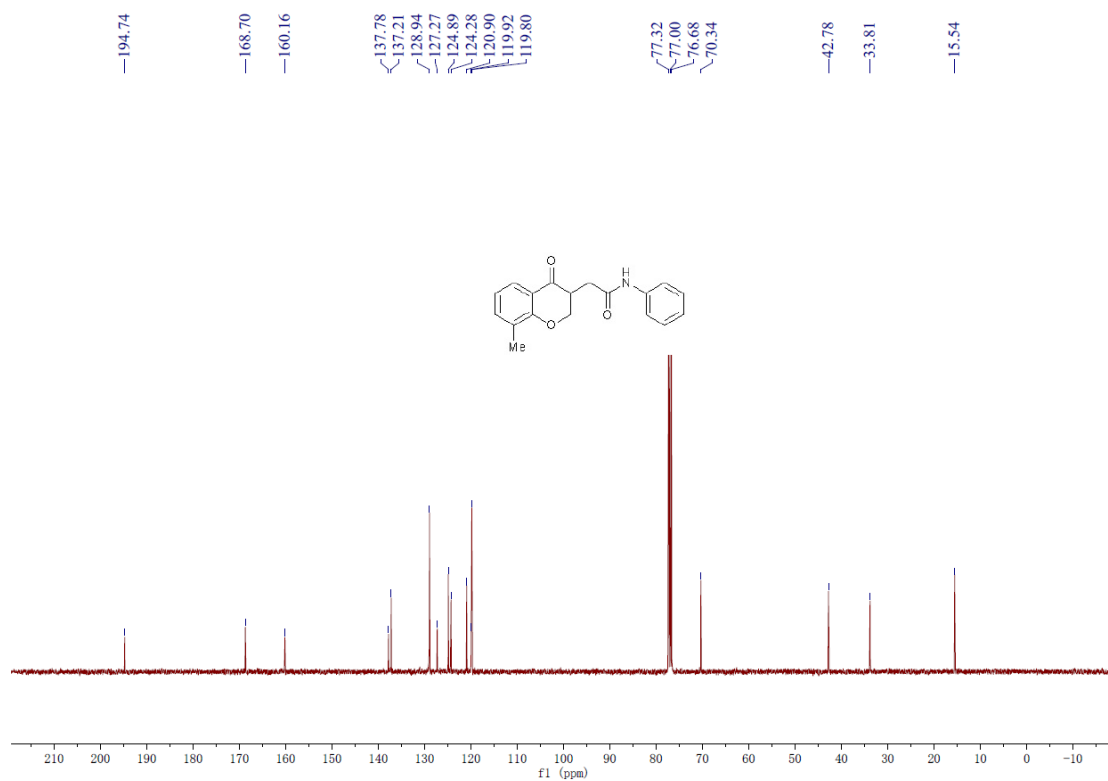

**<sup>13</sup>C spectra of 3ba**

**2-(6-methyl-4-oxochroman-3-yl)-N-phenylacetamide (3ca)**

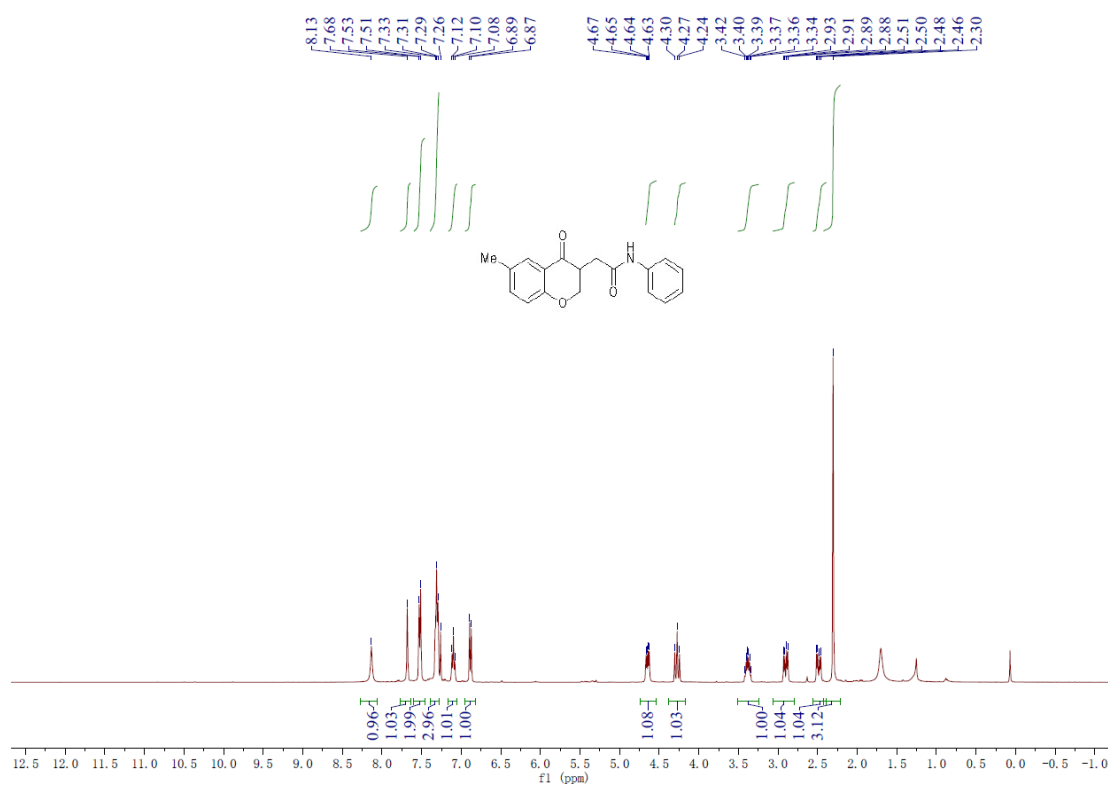

<sup>1</sup>H spectra of **3ca**

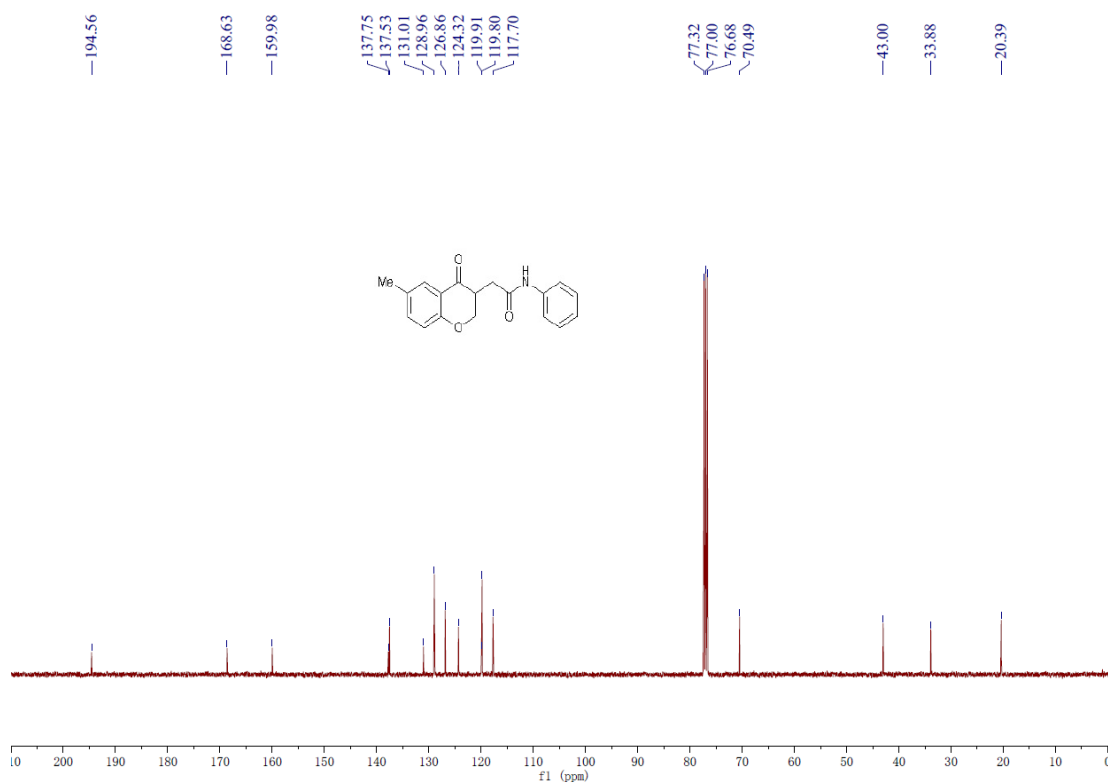

<sup>13</sup>C spectra of **3ca**

**2-(7-methoxy-4-oxochroman-3-yl)-N-phenylacetamide (3da)**

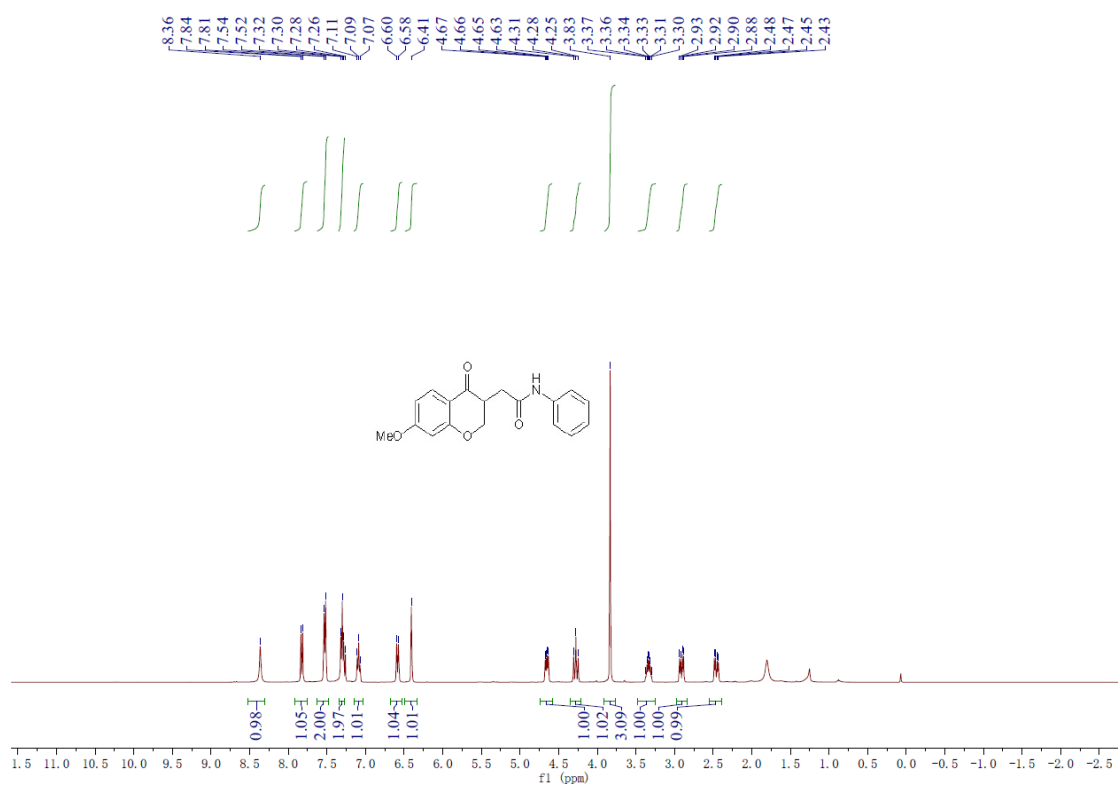

<sup>1</sup>H spectra of **3da**

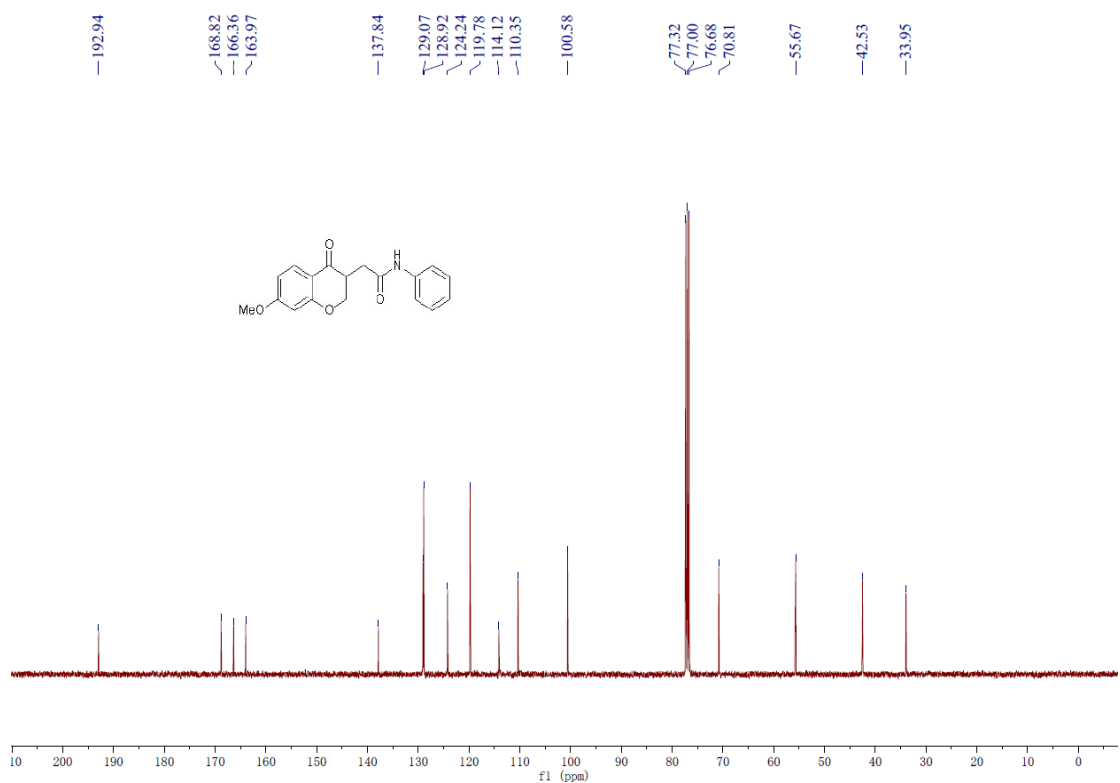

<sup>13</sup>C spectra of **3da**

## 2-(6-methoxy-4-oxochroman-3-yl)-*N*-phenylacetamide (3ea)

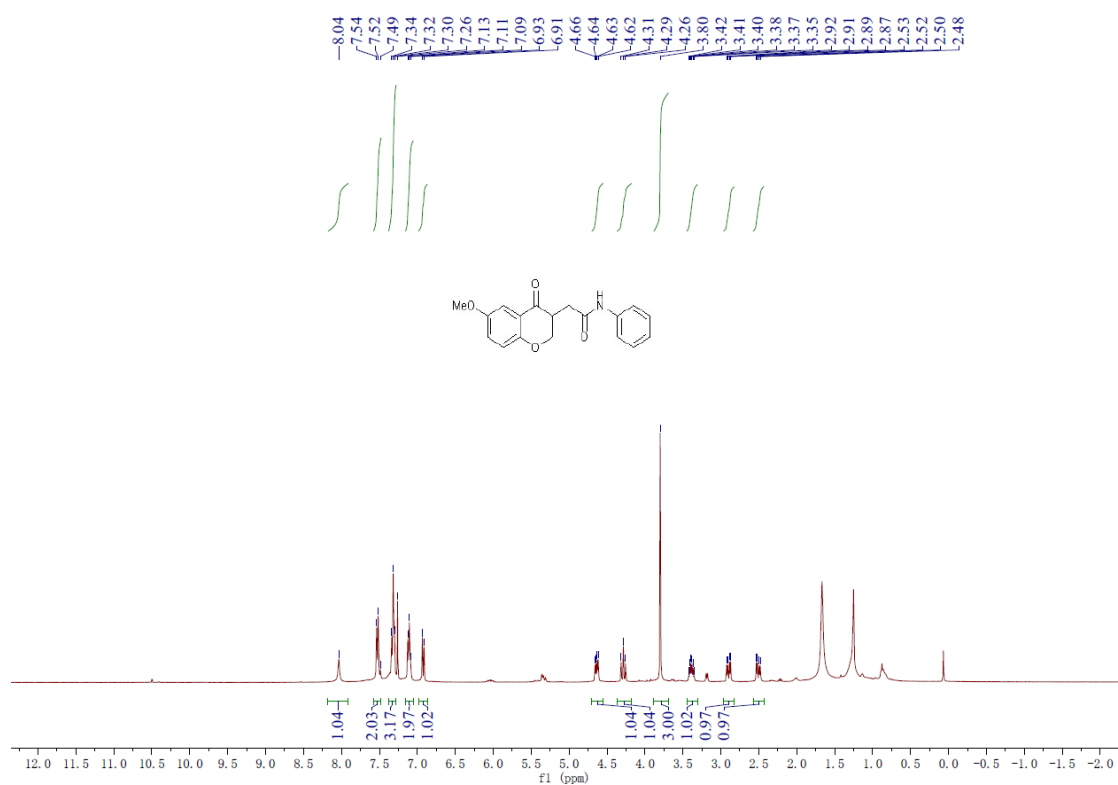

<sup>1</sup>H spectra of 3ea

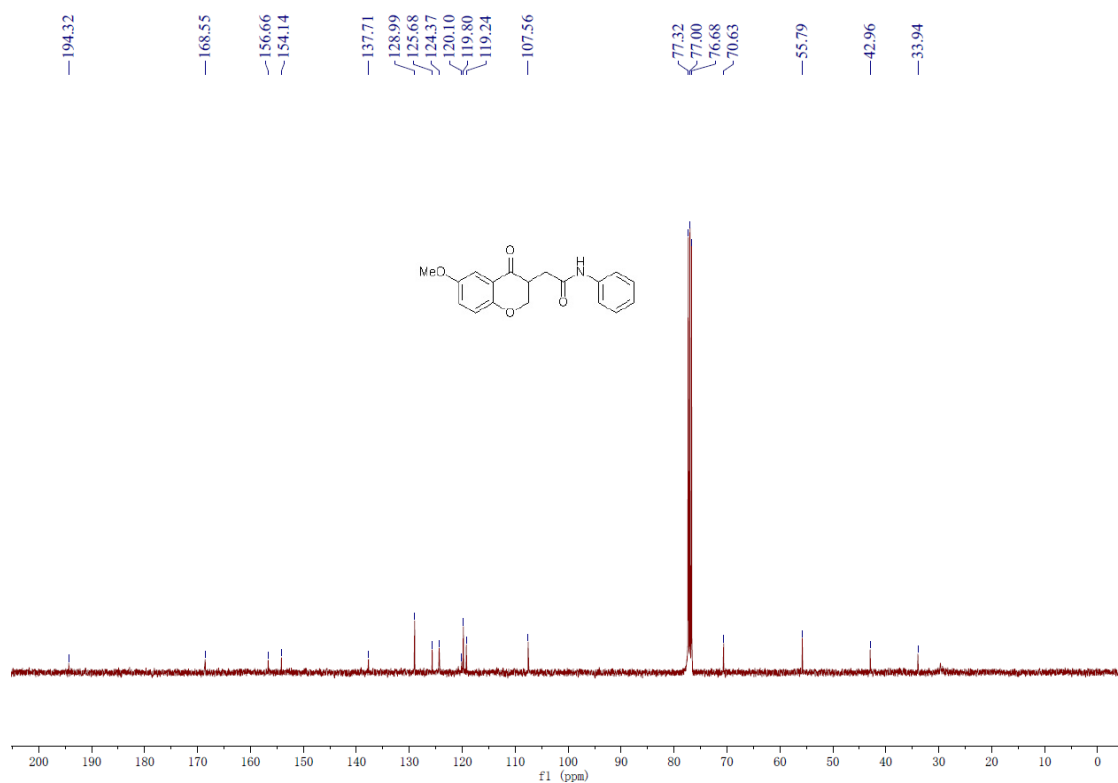

<sup>13</sup>C spectra of 3ea

**2-(8-(tert-butyl)-4-oxochroman-3-yl)-N-phenylacetamide (3fa)**

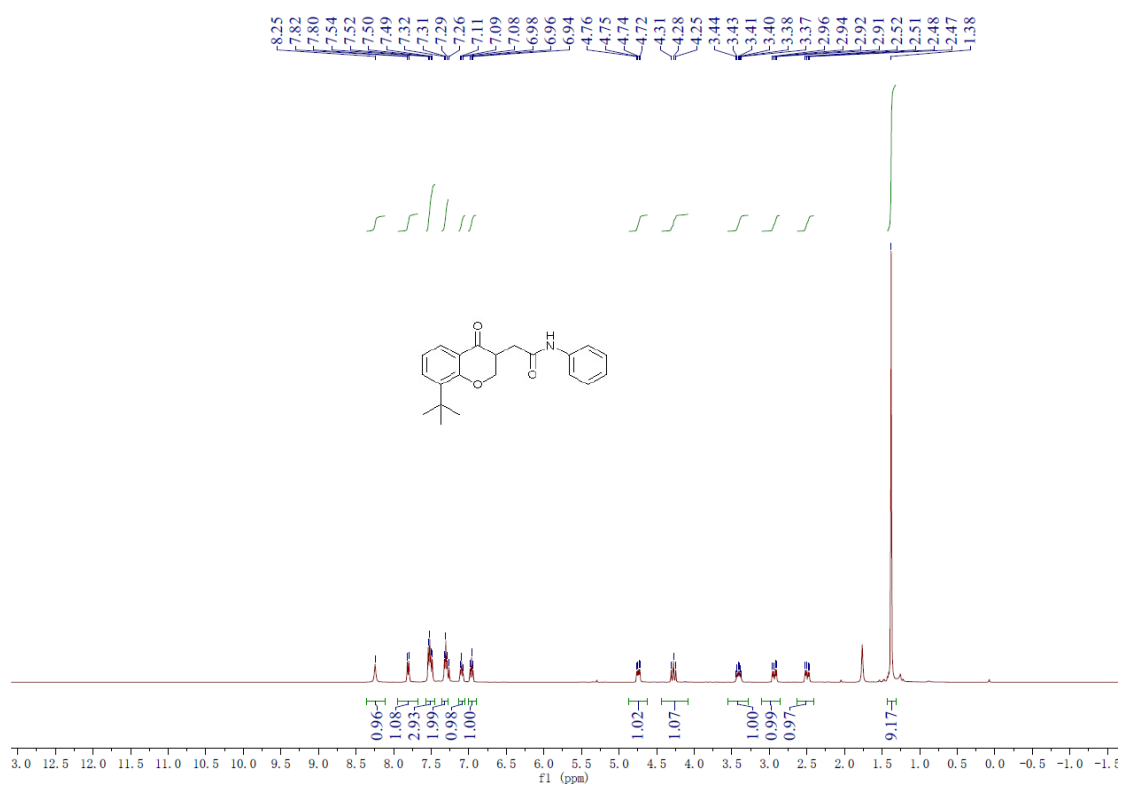

<sup>1</sup>H spectra of 3fa

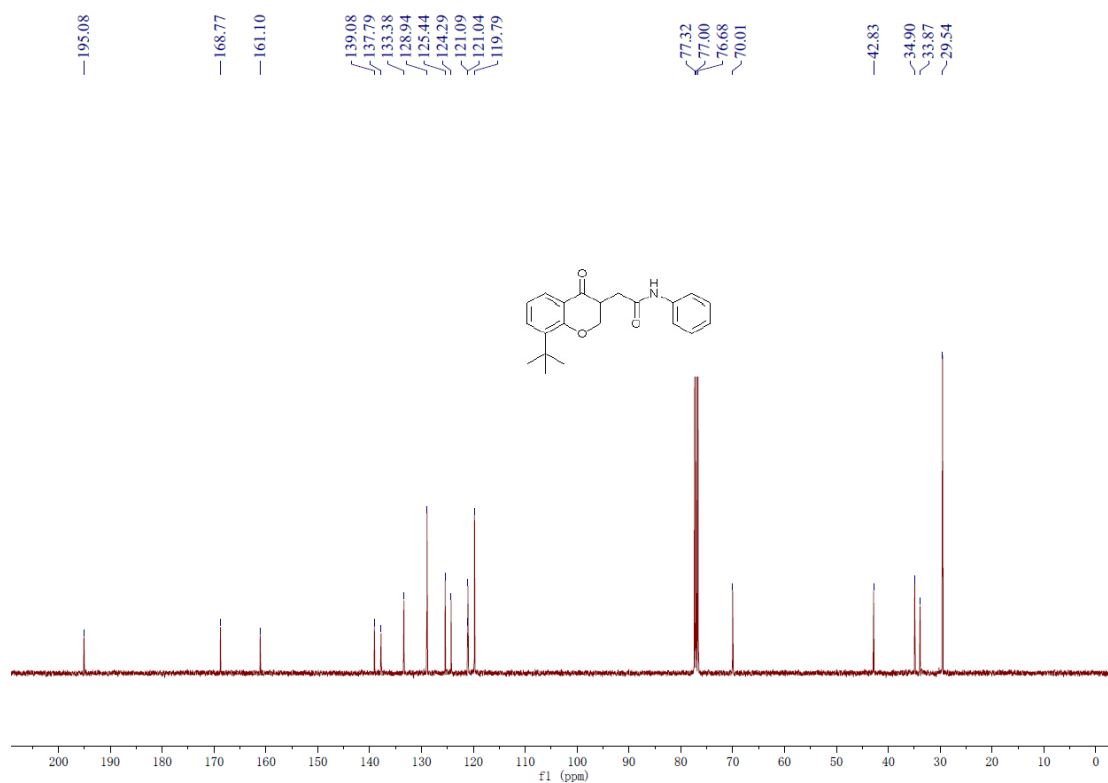

<sup>13</sup>C spectra of 3fa

**2-(7-fluoro-4-oxochroman-3-yl)-N-phenylacetamide (3ga)**

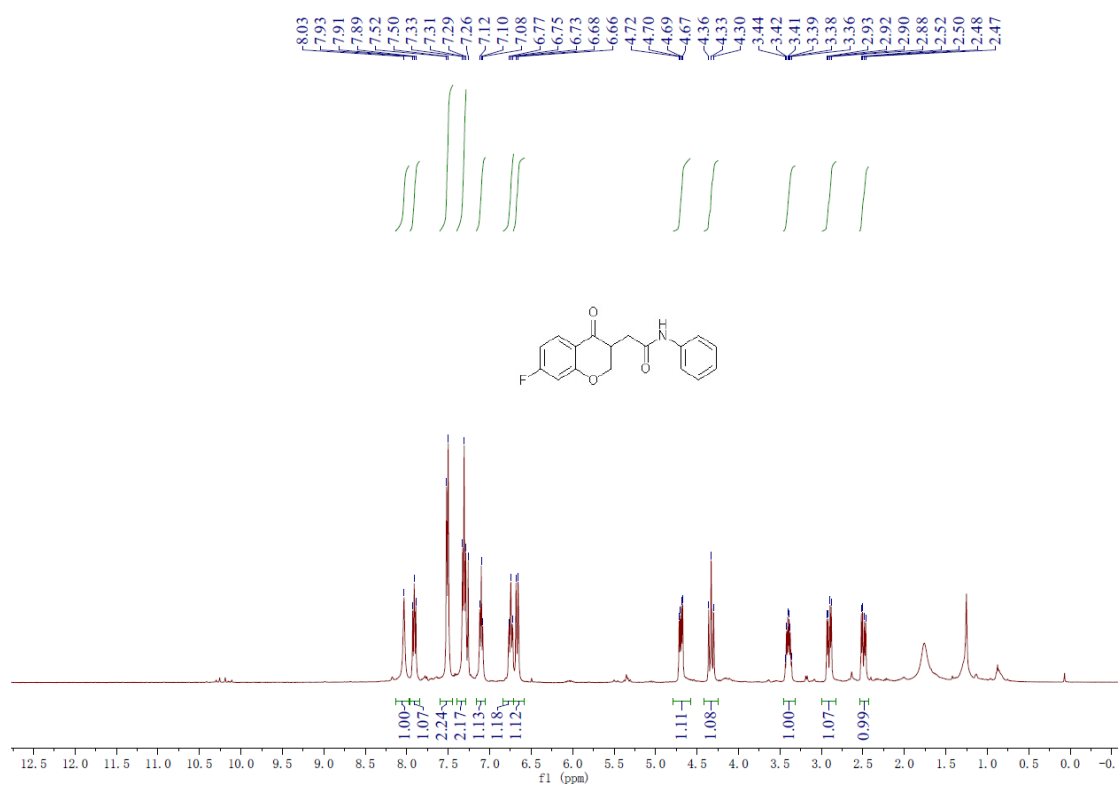

<sup>1</sup>H spectra of 3ga

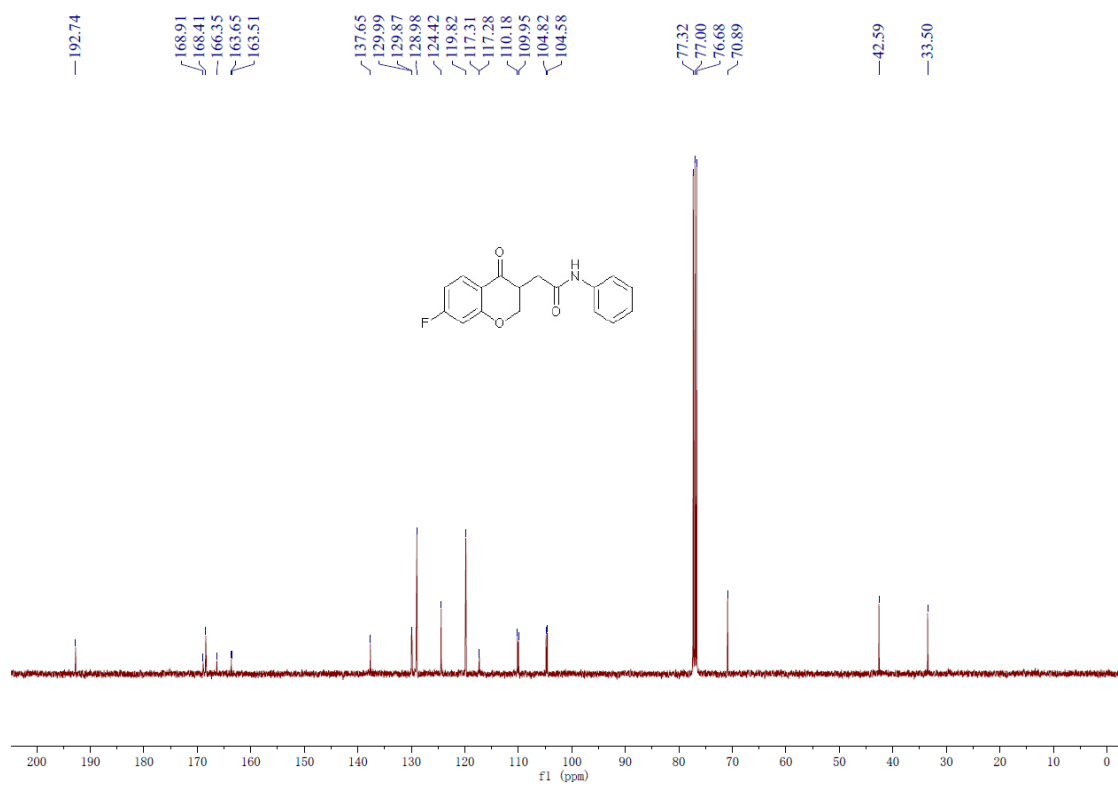

<sup>13</sup>C spectra of 3ga



**2-(6-fluoro-4-oxochroman-3-yl)-N-phenylacetamide (3ha)**

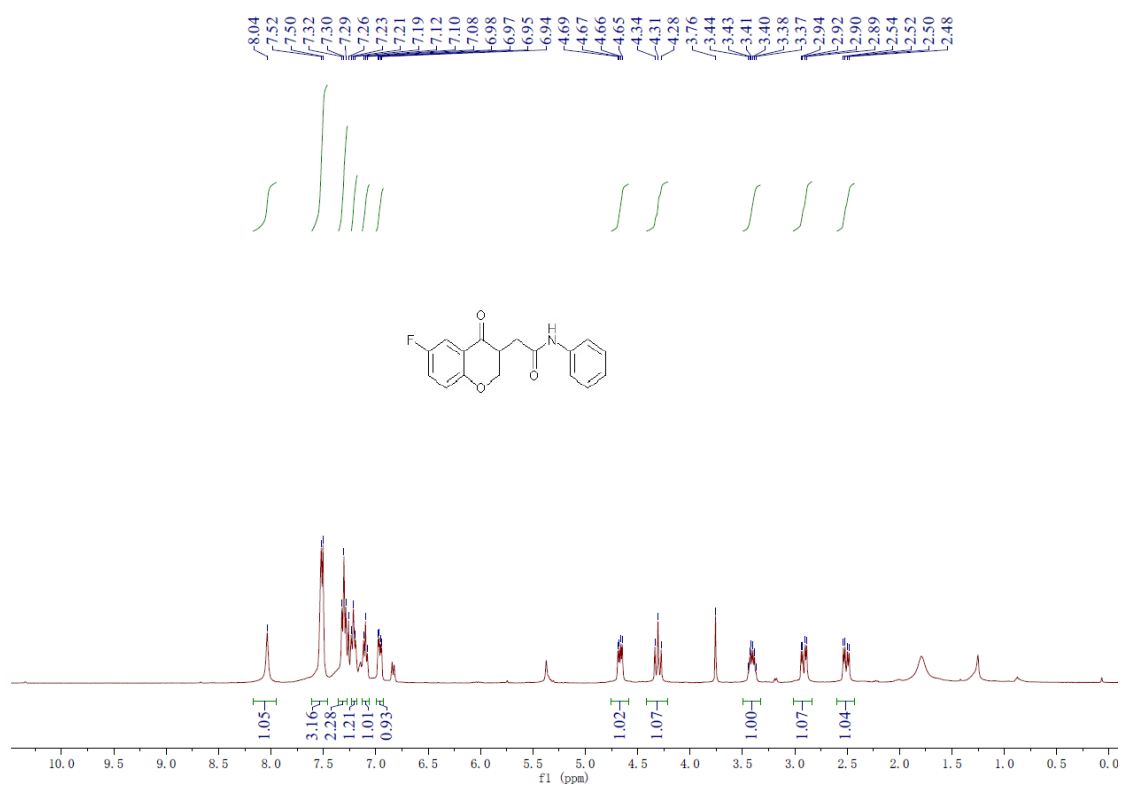

<sup>1</sup>H spectra of 3ha

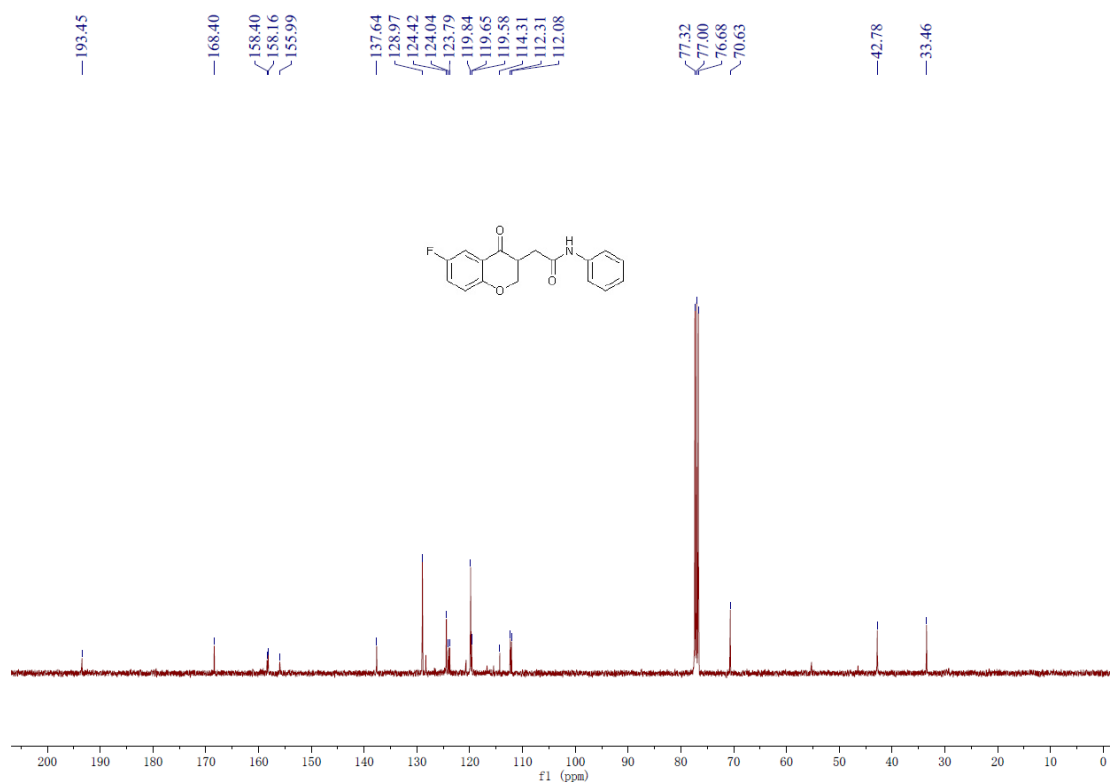

<sup>13</sup>C spectra of 3ha

**2-(8-chloro-4-oxochroman-3-yl)-*N*-phenylacetamide (3ia)**

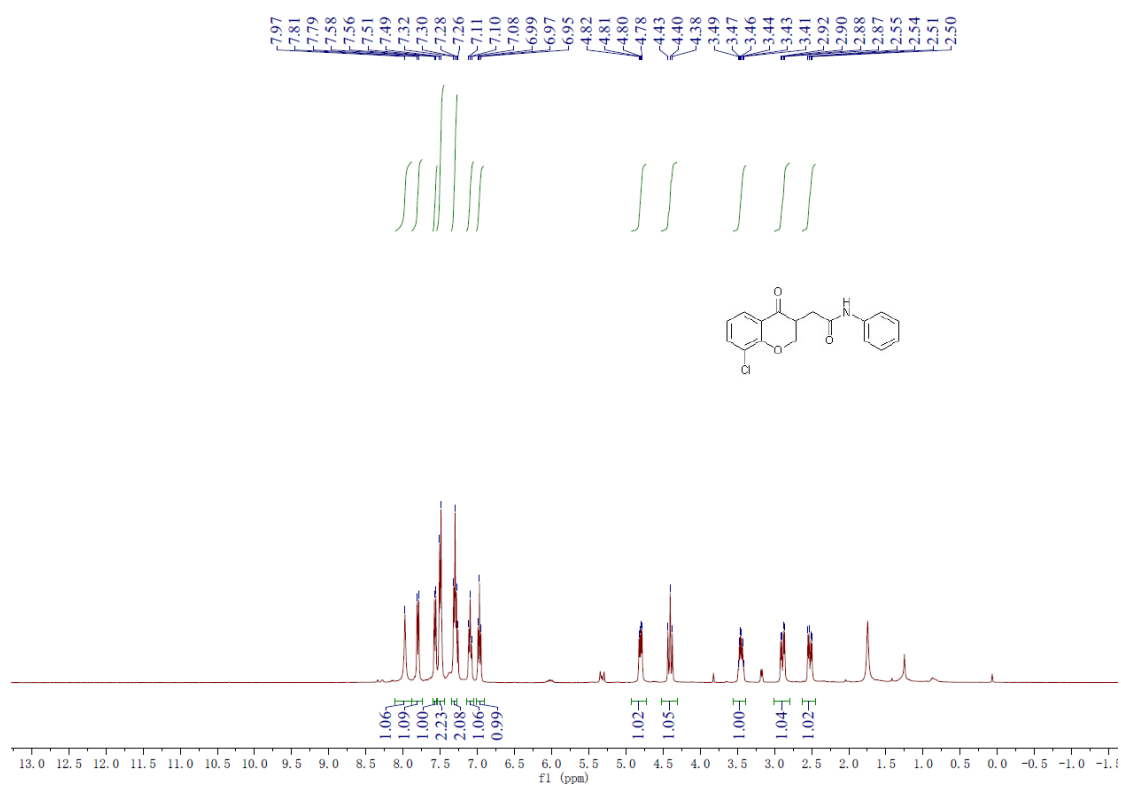

<sup>1</sup>H spectra of 3ia

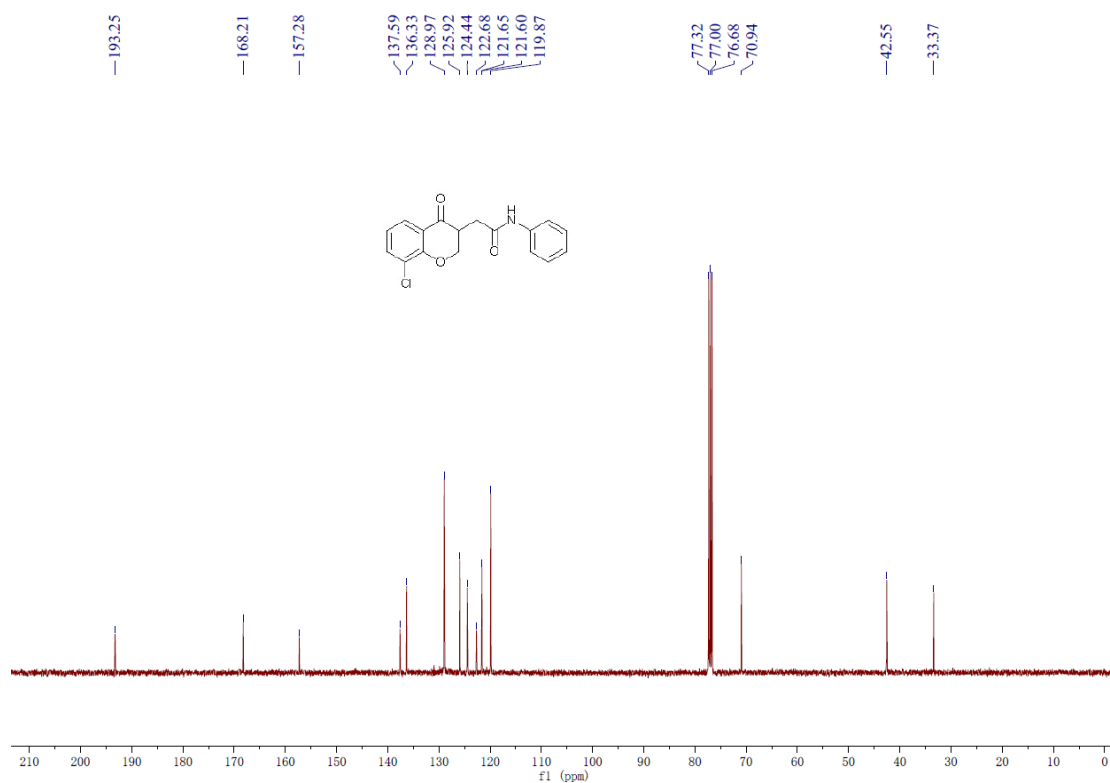

<sup>13</sup>C spectra of 3ia

**2-(7-chloro-4-oxochroman-3-yl)-*N*-phenylacetamide (3ja)**

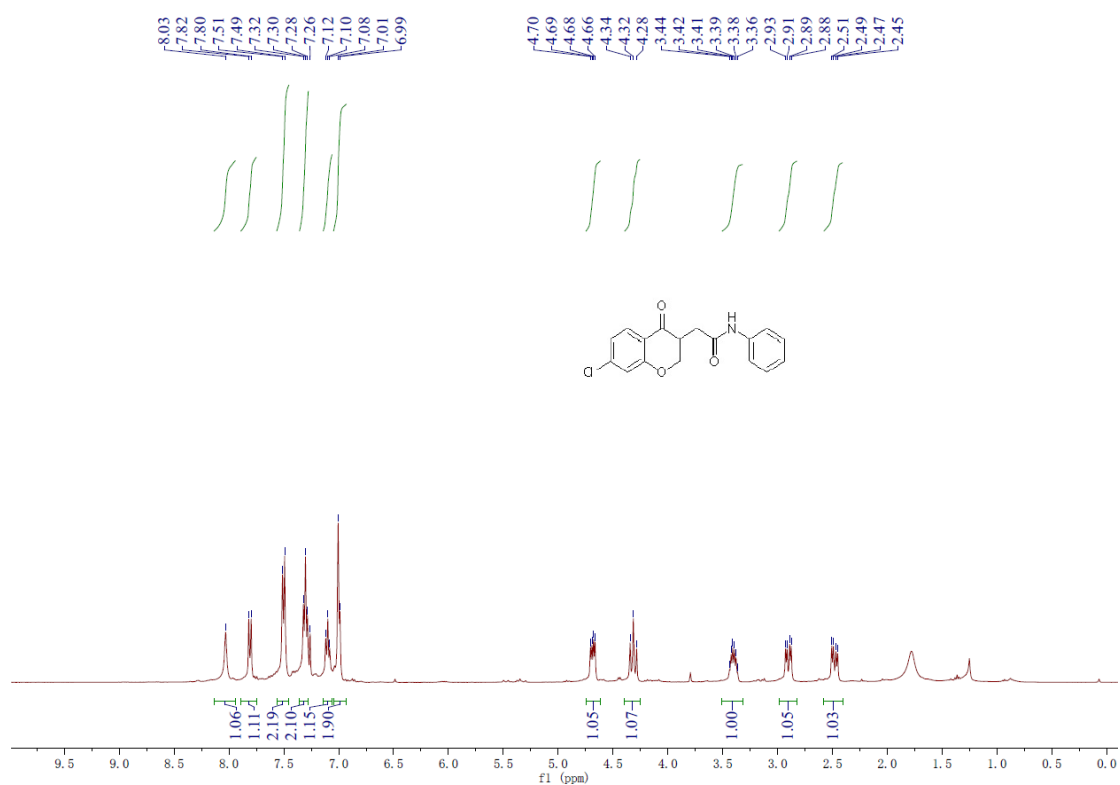

<sup>1</sup>H spectra of 3ja

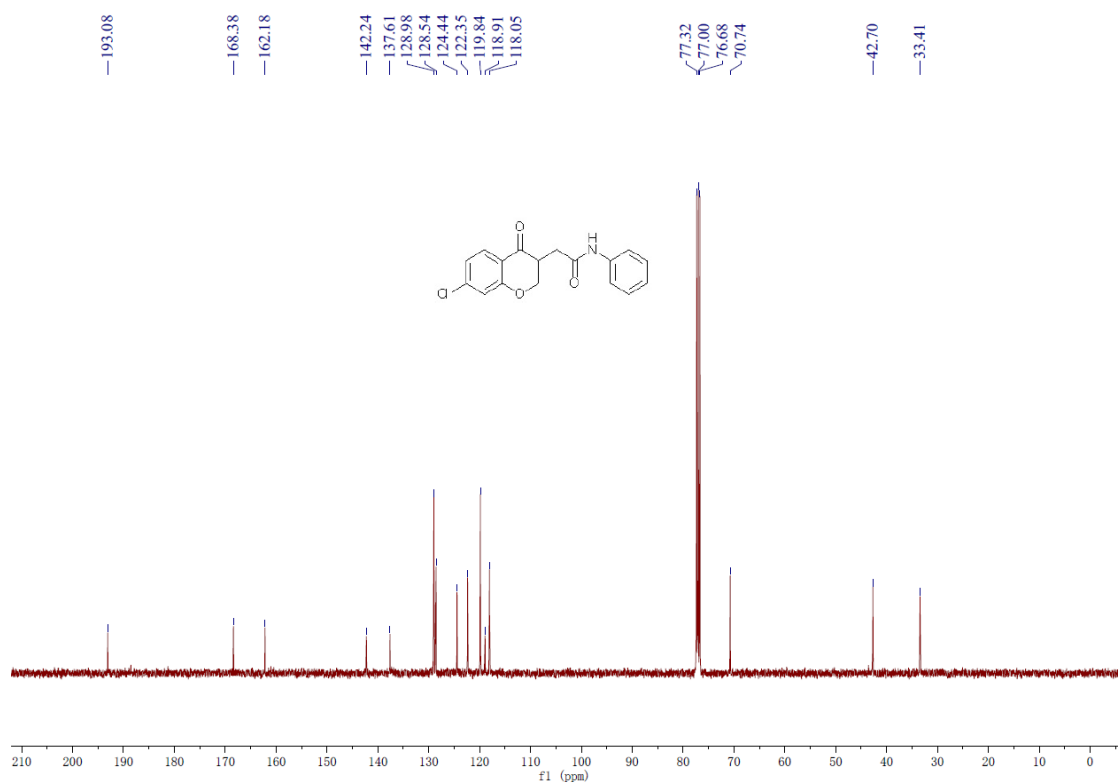

<sup>13</sup>C spectra of 3ja

**2-(5-chloro-4-oxochroman-3-yl)-*N*-phenylacetamide (3ka)**

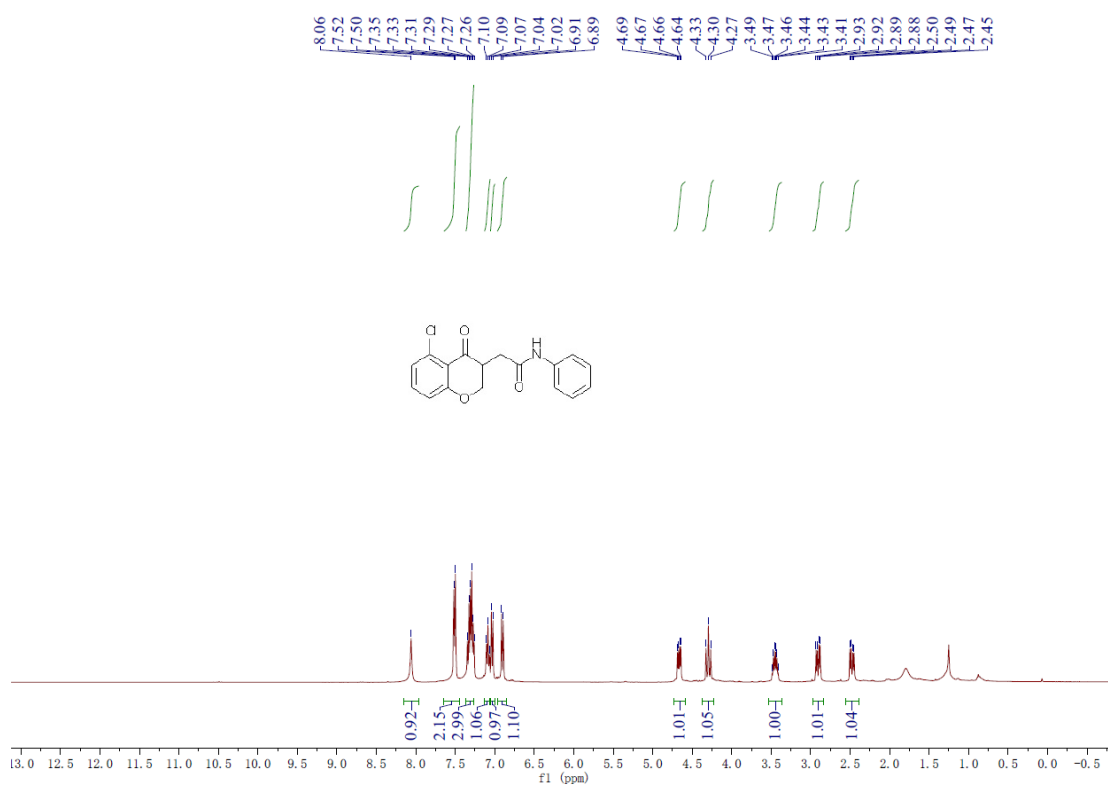

<sup>1</sup>H spectra of **3ka**

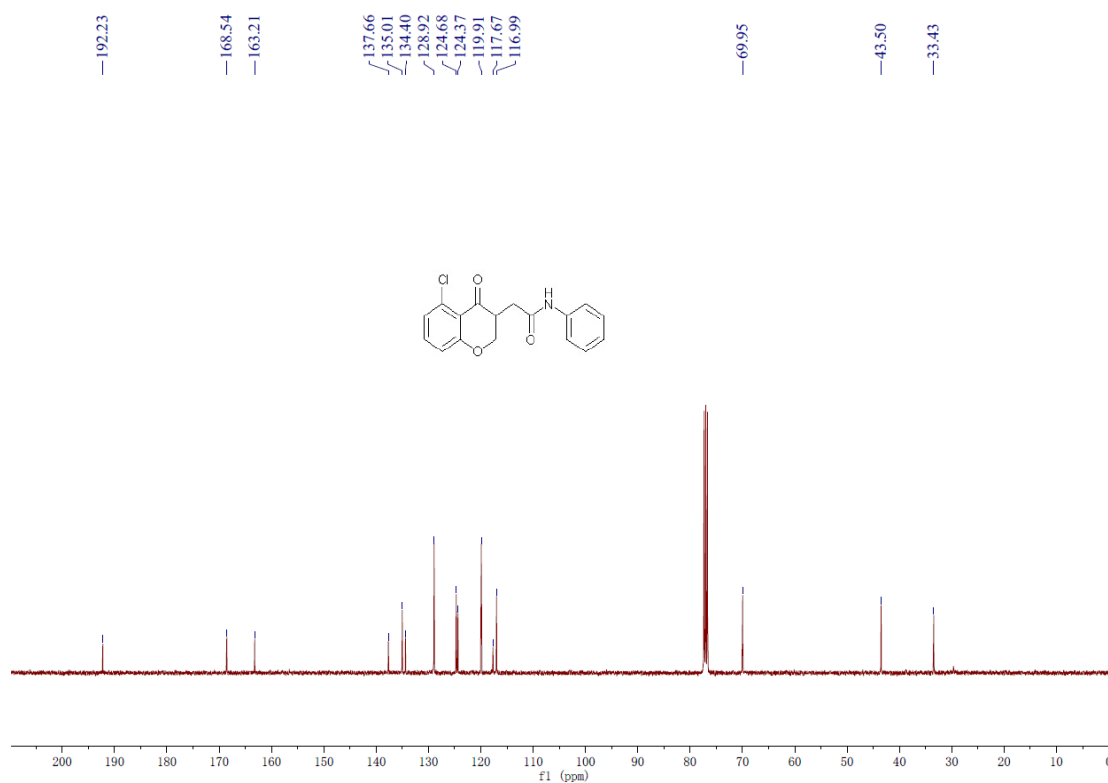

<sup>13</sup>C spectra of **3ka**

**2-(7-bromo-4-oxochroman-3-yl)-N-phenylacetamide (3la)**

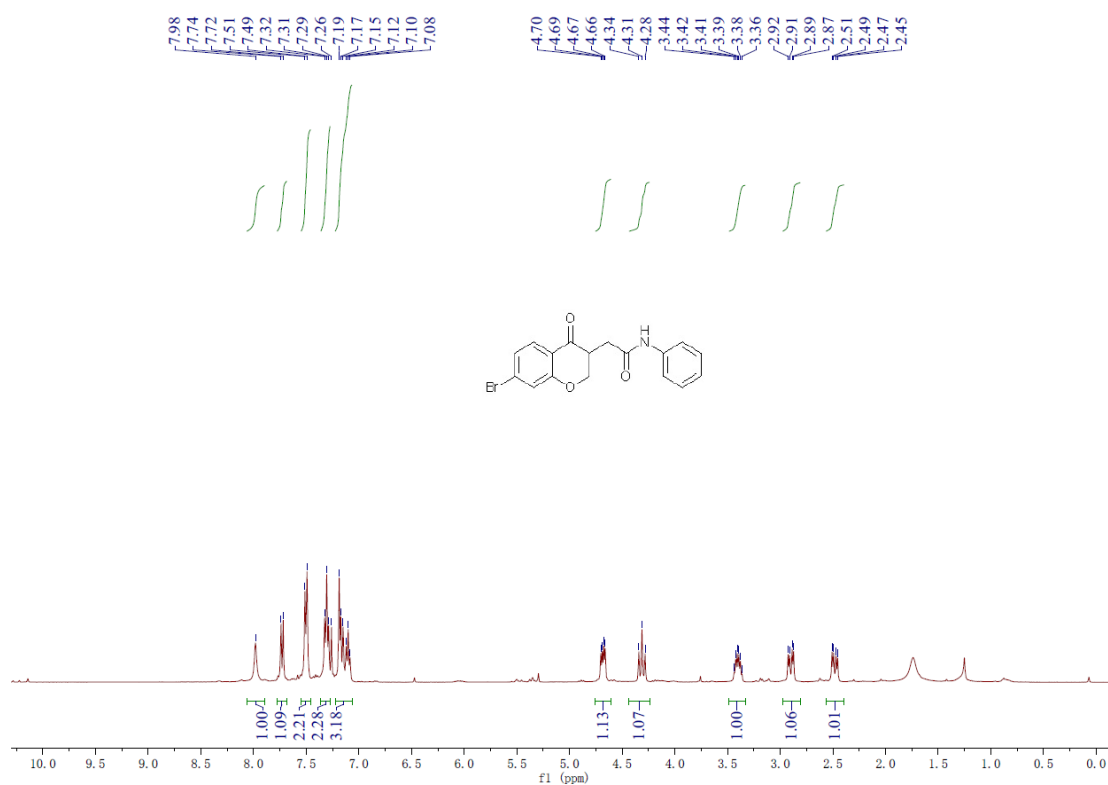

<sup>1</sup>H spectra of 3la

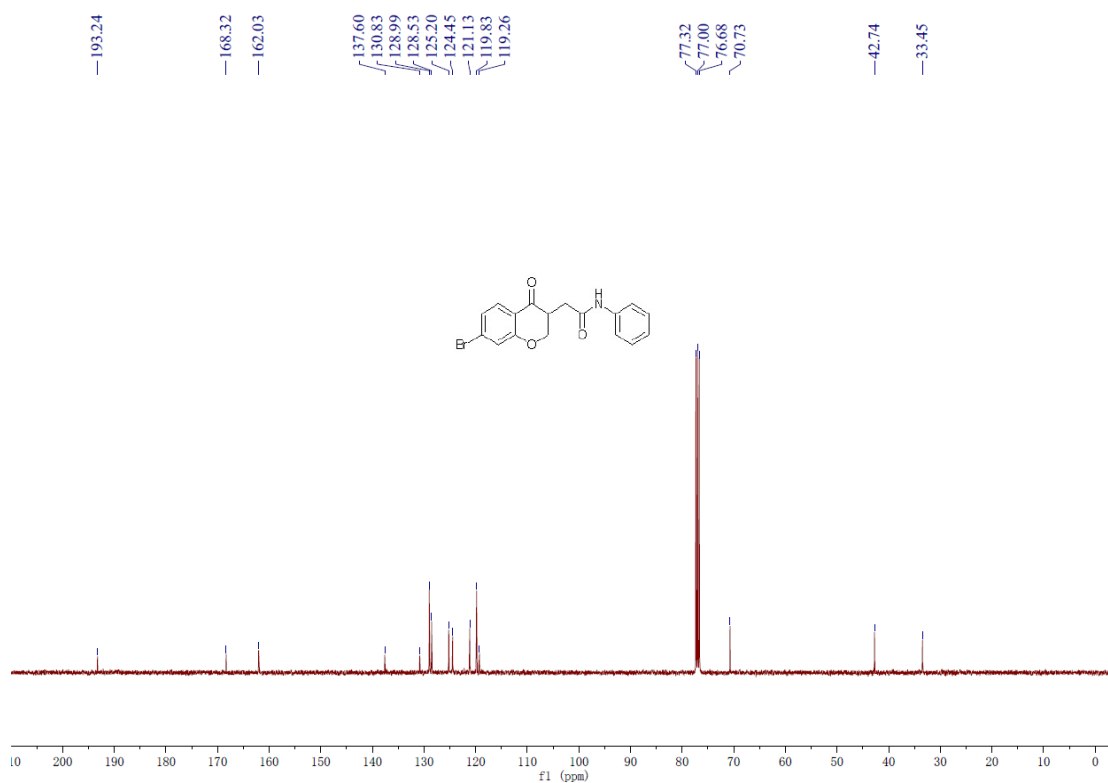

<sup>13</sup>C spectra of 3la

**2-(6-bromo-4-oxochroman-3-yl)-N-phenylacetamide (3ma)**

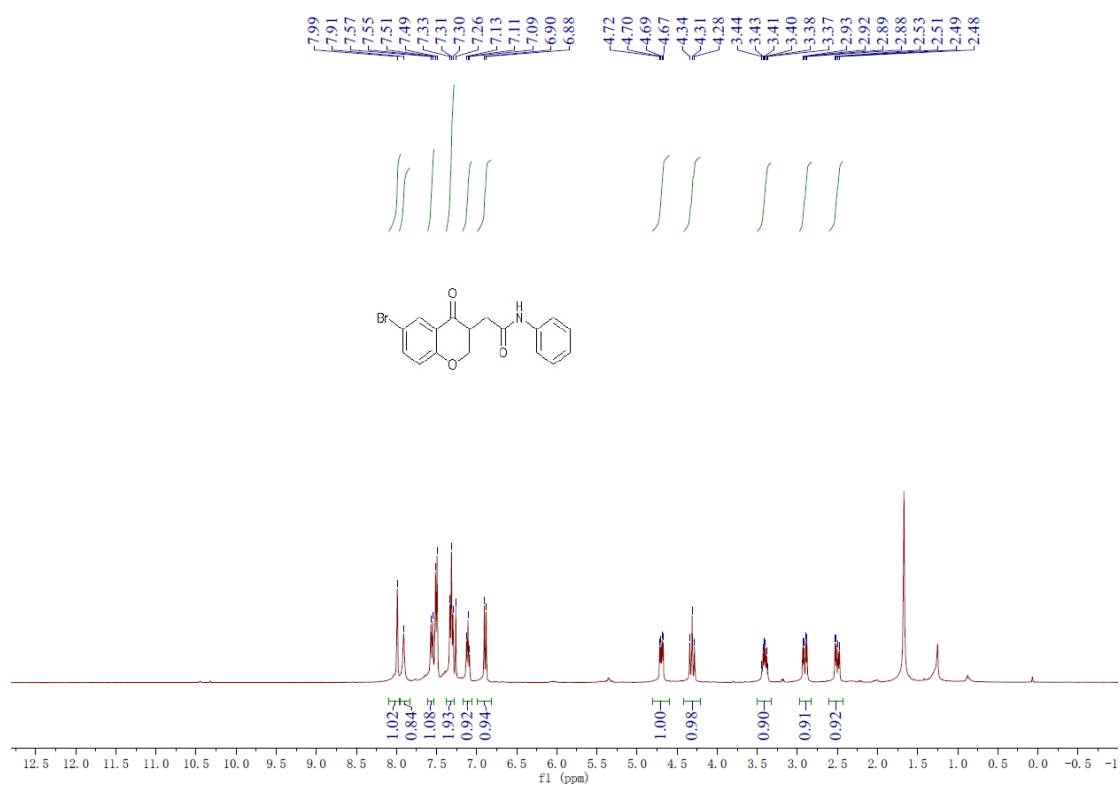

<sup>1</sup>H spectra of 3ma

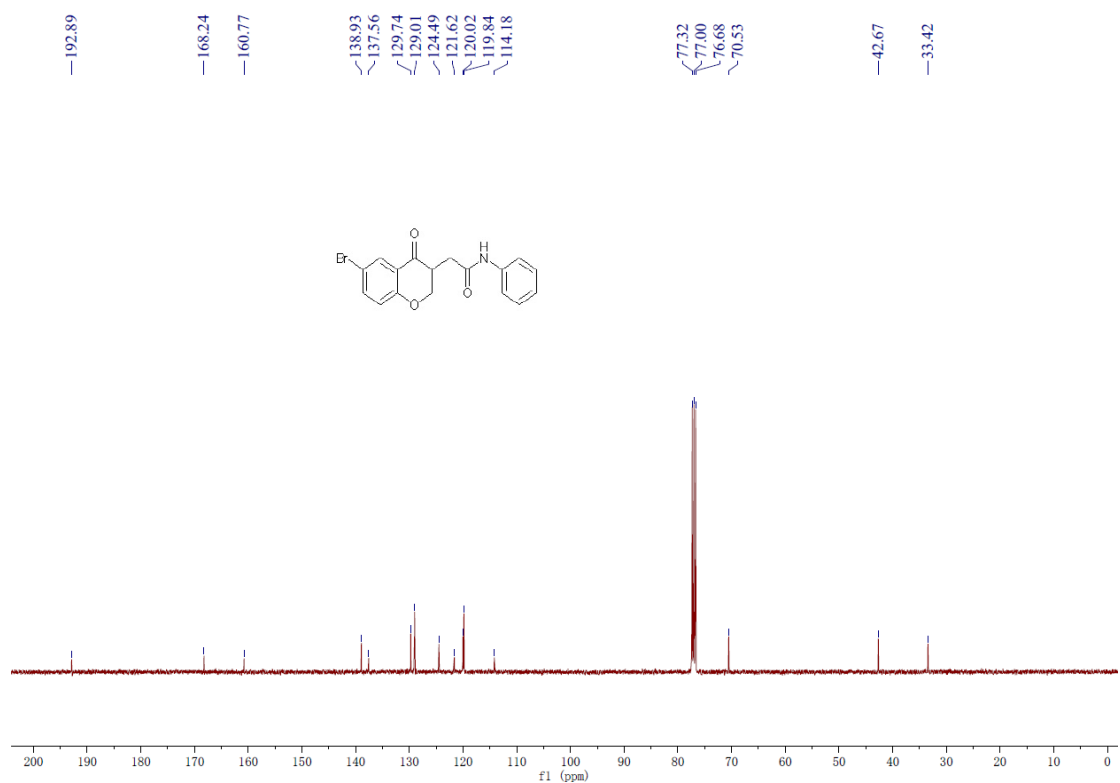

<sup>13</sup>C spectra of 3ma

**methyl 4-oxo-3-(2-oxo-2-(phenylamino)ethyl)chroman-6-carboxylate (3na)**

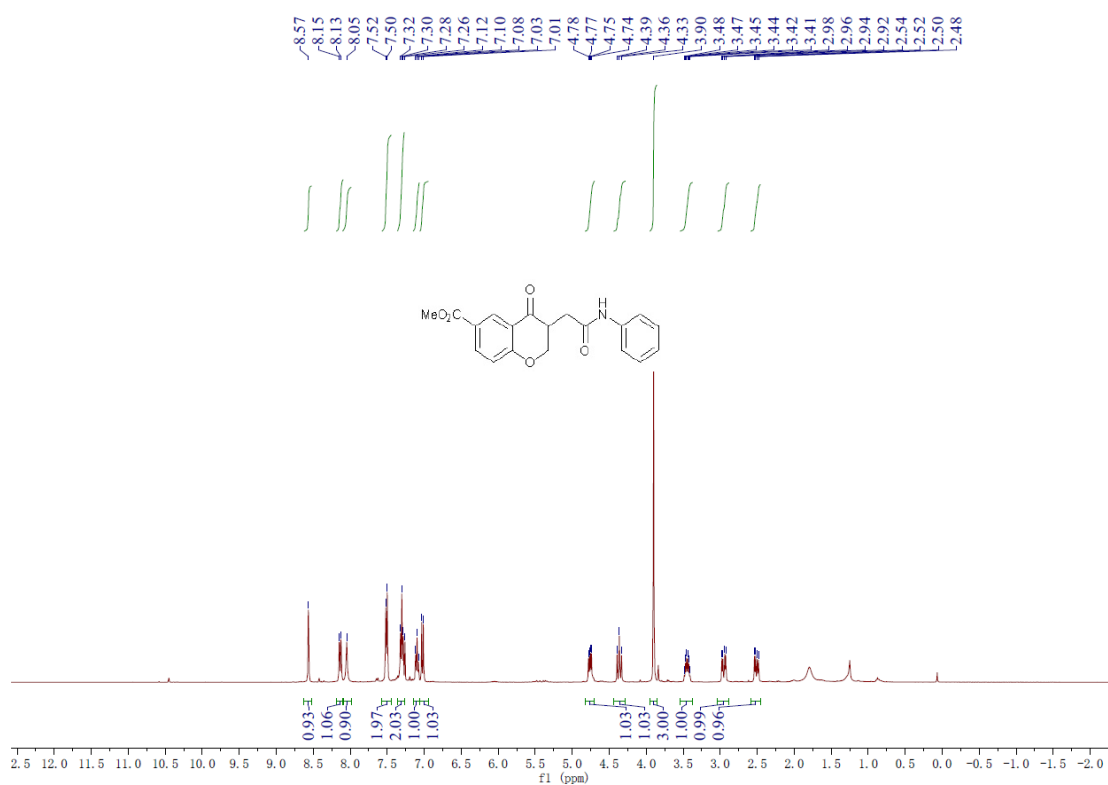

<sup>1</sup>H spectra of **3na**

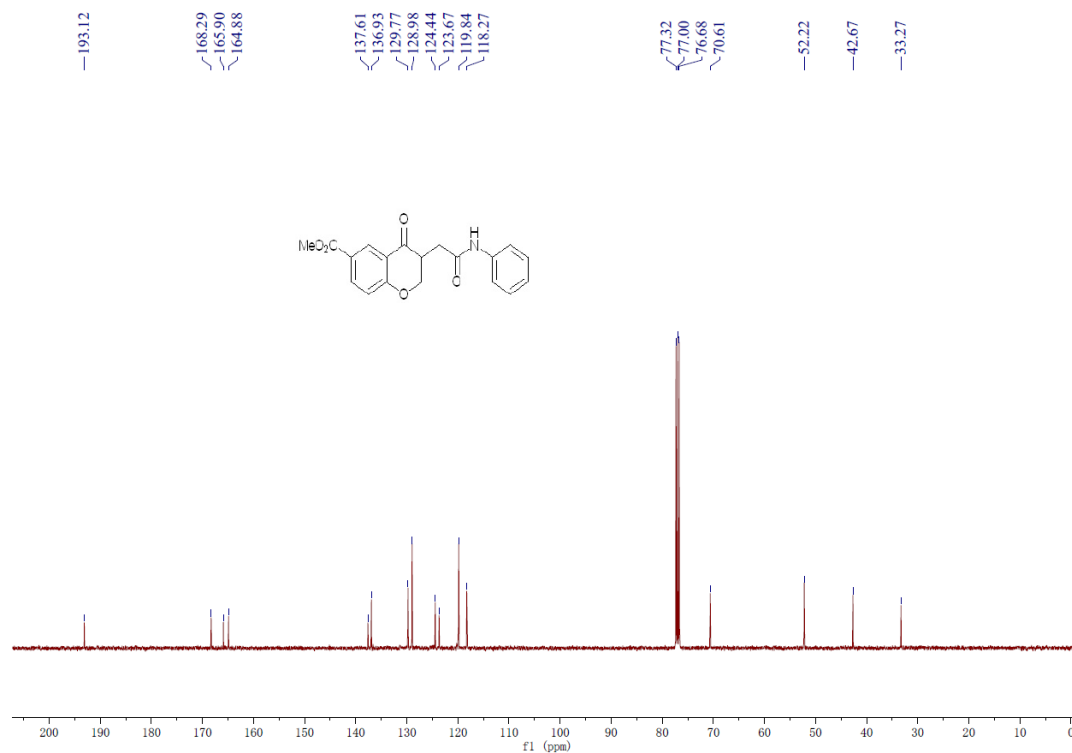

<sup>13</sup>C spectra of **3na**

**2-(1-oxo-2,3-dihydro-1H-benzo[f]chromen-2-yl)-N-phenylacetamide (30a)**

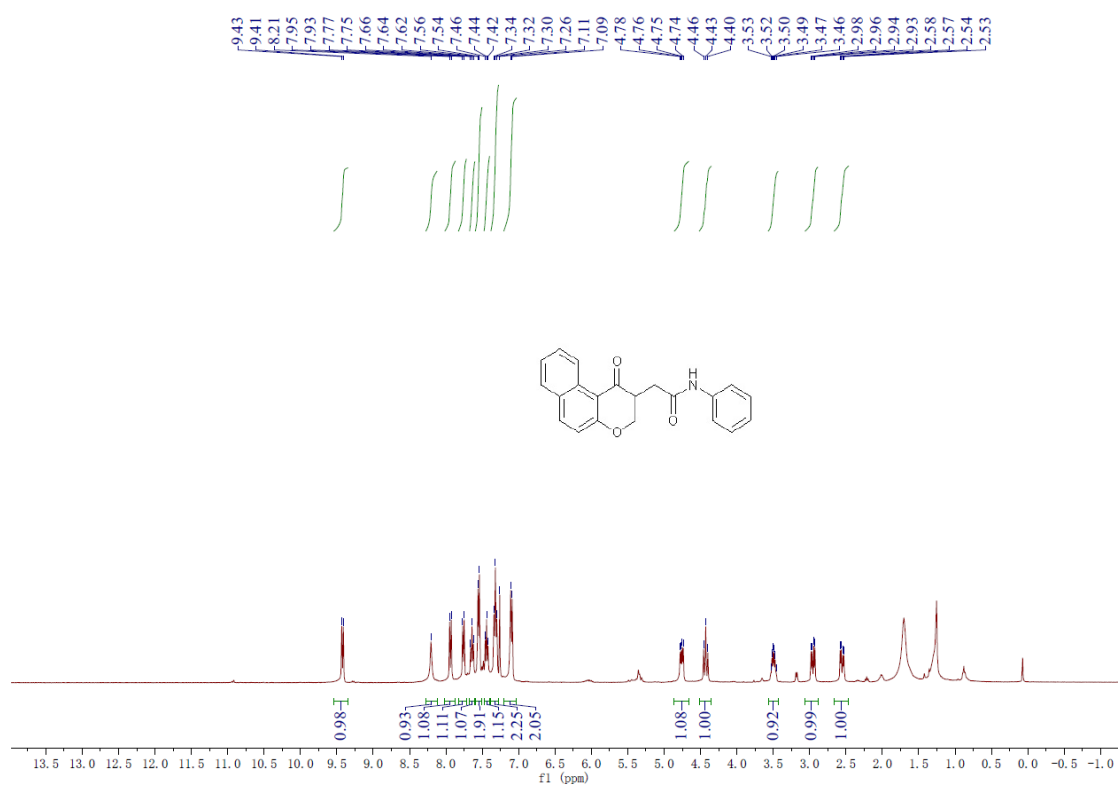

<sup>1</sup>H spectra of 30a

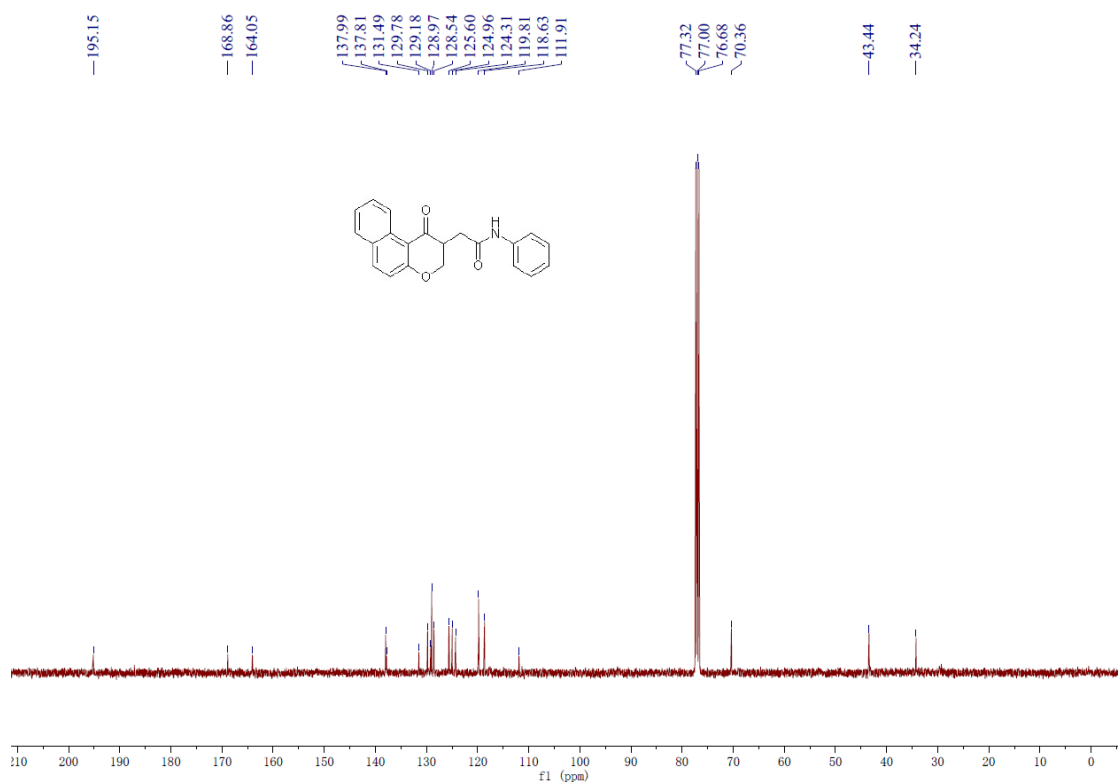

<sup>13</sup>C spectra of 30a



**2-(3-methyl-4-oxochroman-3-yl)-N-phenylacetamide (3pa)**

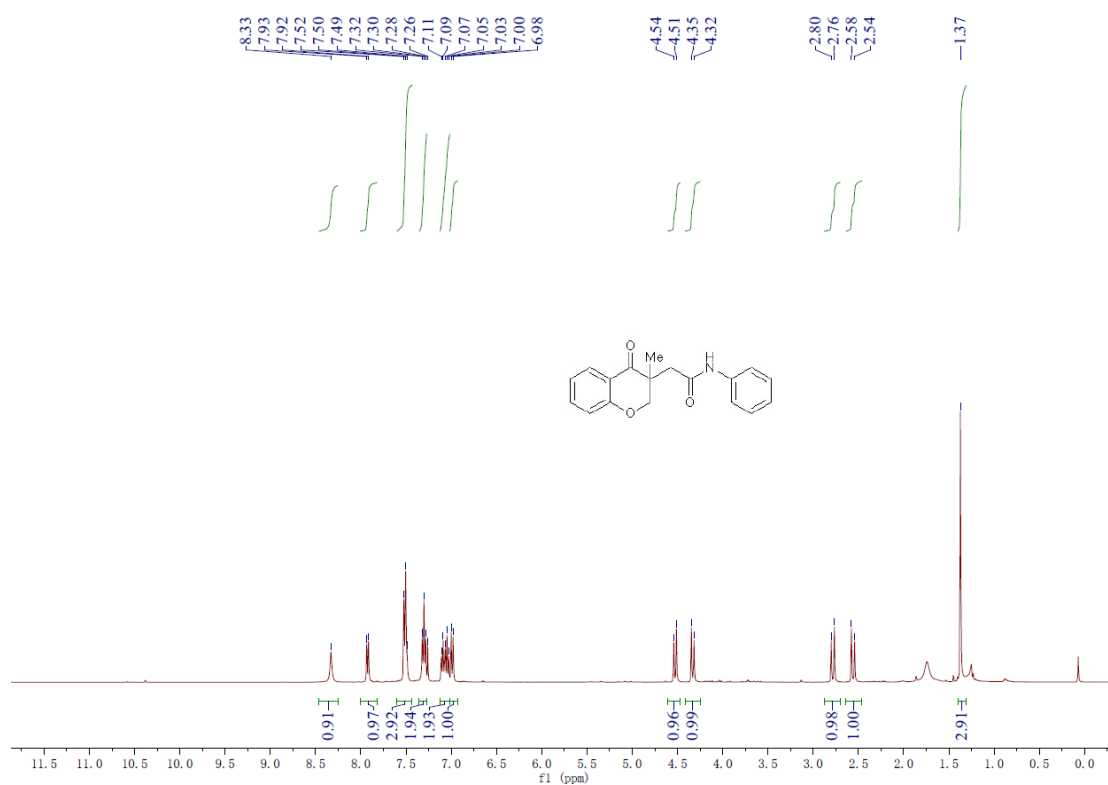

<sup>1</sup>H spectra of 3pa

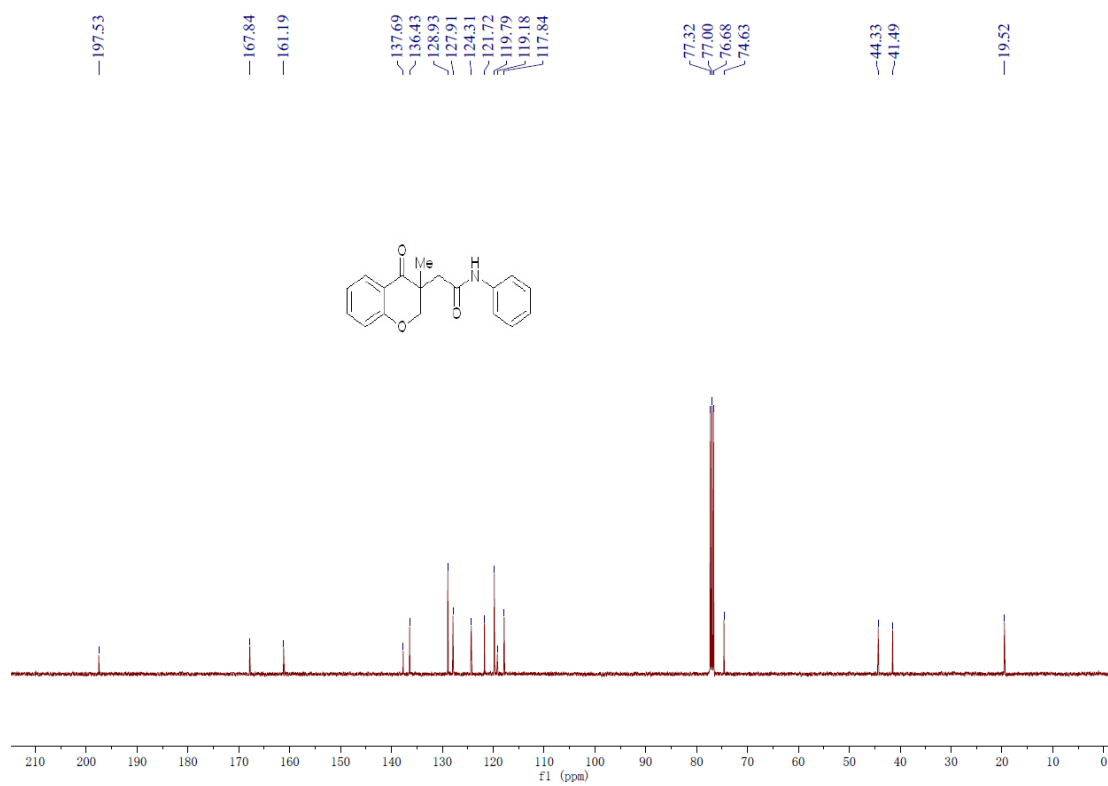

<sup>13</sup>C spectra of 3pa

**2-(1-oxo-2,3-dihydro-1H-inden-2-yl)-N-phenylacetamide (3qa)**

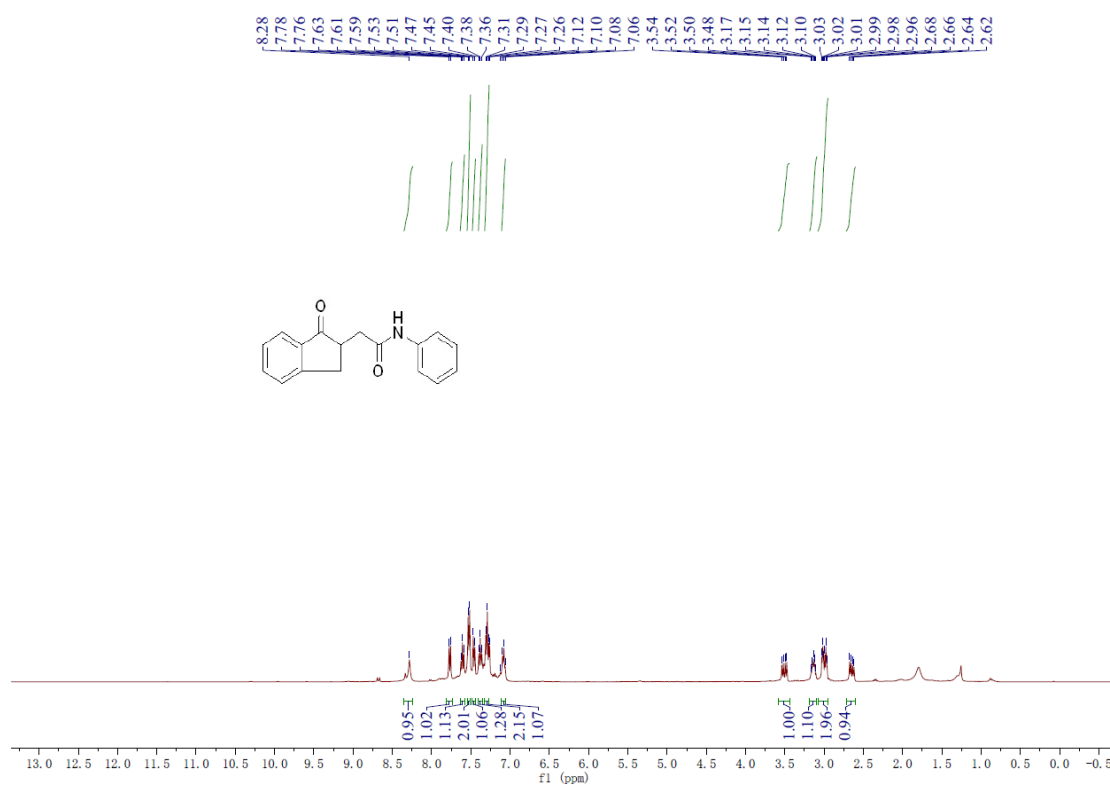

<sup>1</sup>H spectra of 3qa

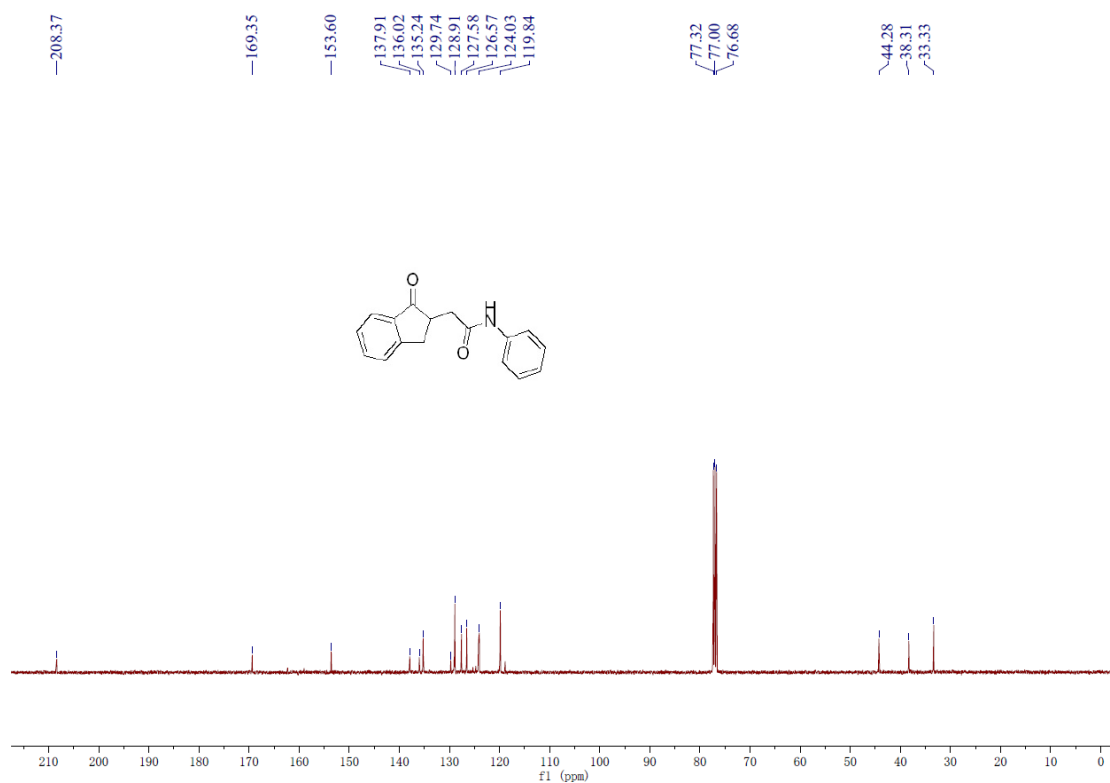

<sup>13</sup>C spectra of 3qa

**2-(4-oxochroman-3-yl)-N-(p-tolyl)acetamide (3ab)**

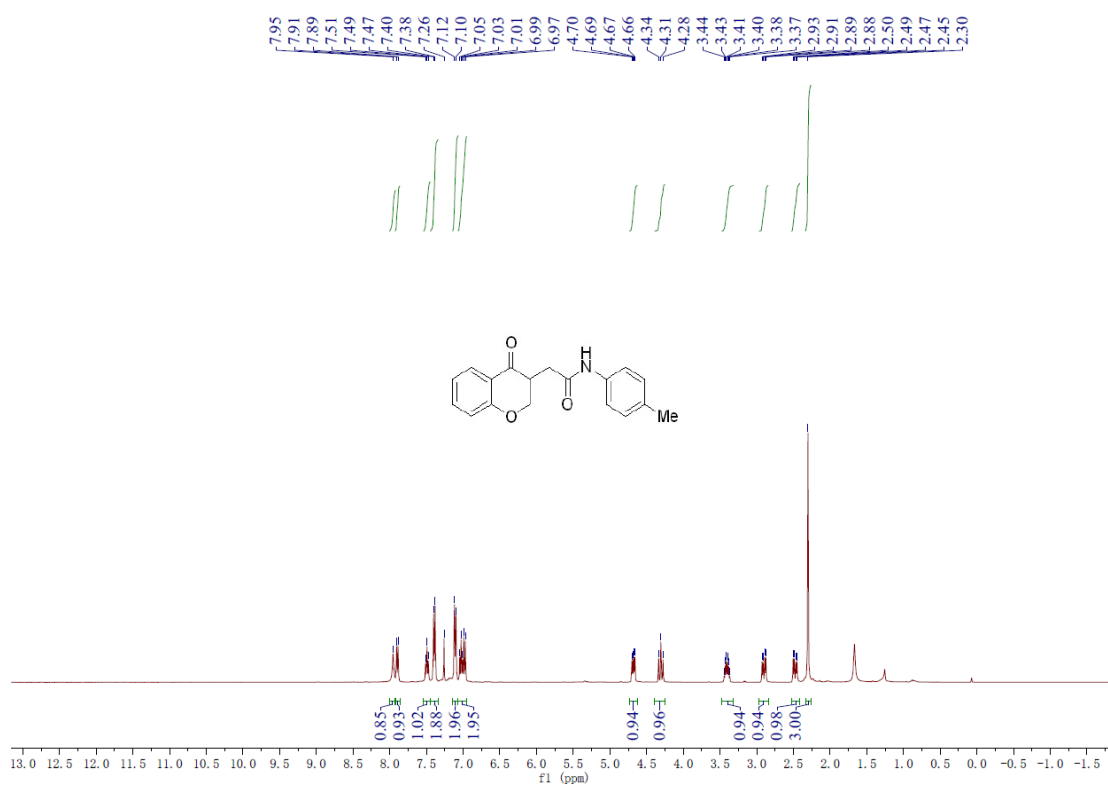

<sup>1</sup>H spectra of **3ab**

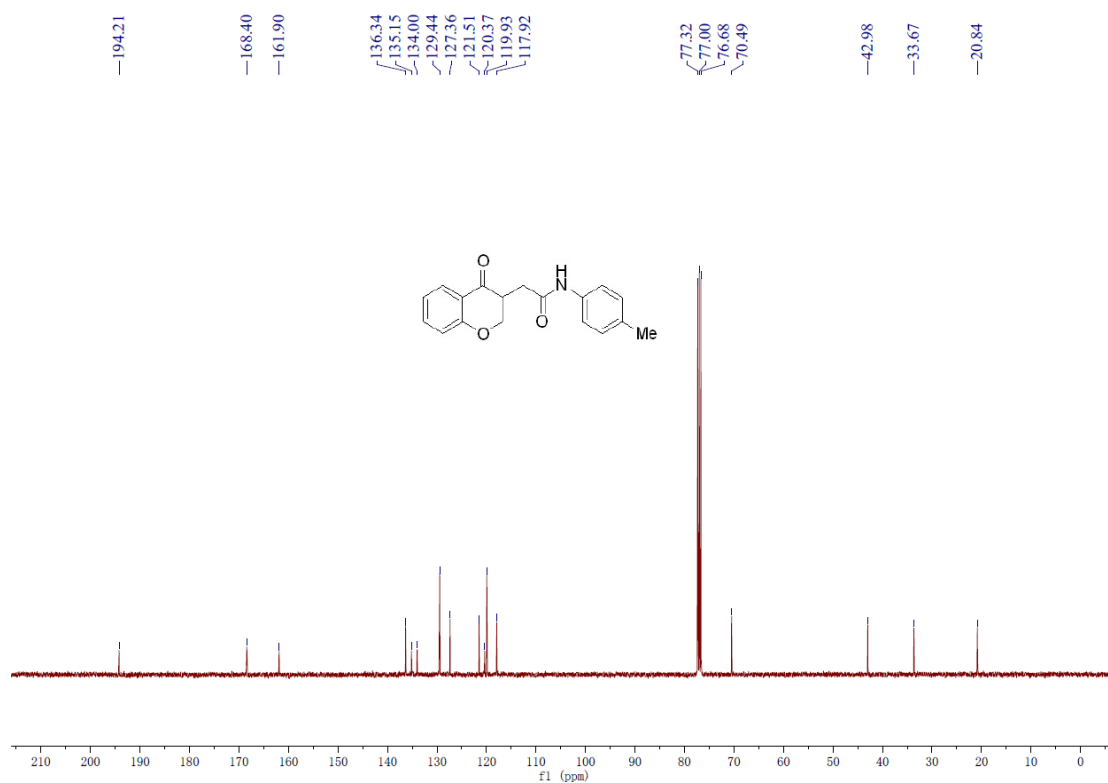

<sup>13</sup>C spectra of **3ab**

***N*-(4-methoxyphenyl)-2-(4-oxochroman-3-yl)acetamide (3ac)**

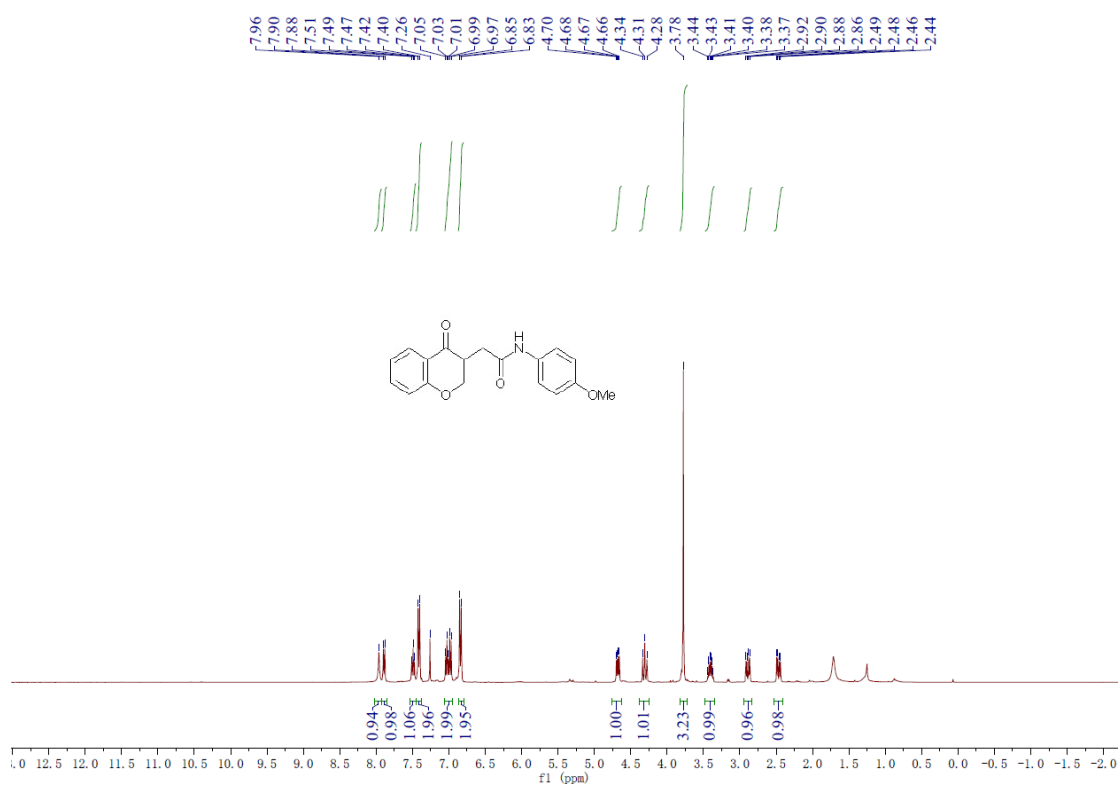

<sup>1</sup>H spectra of **3ac**

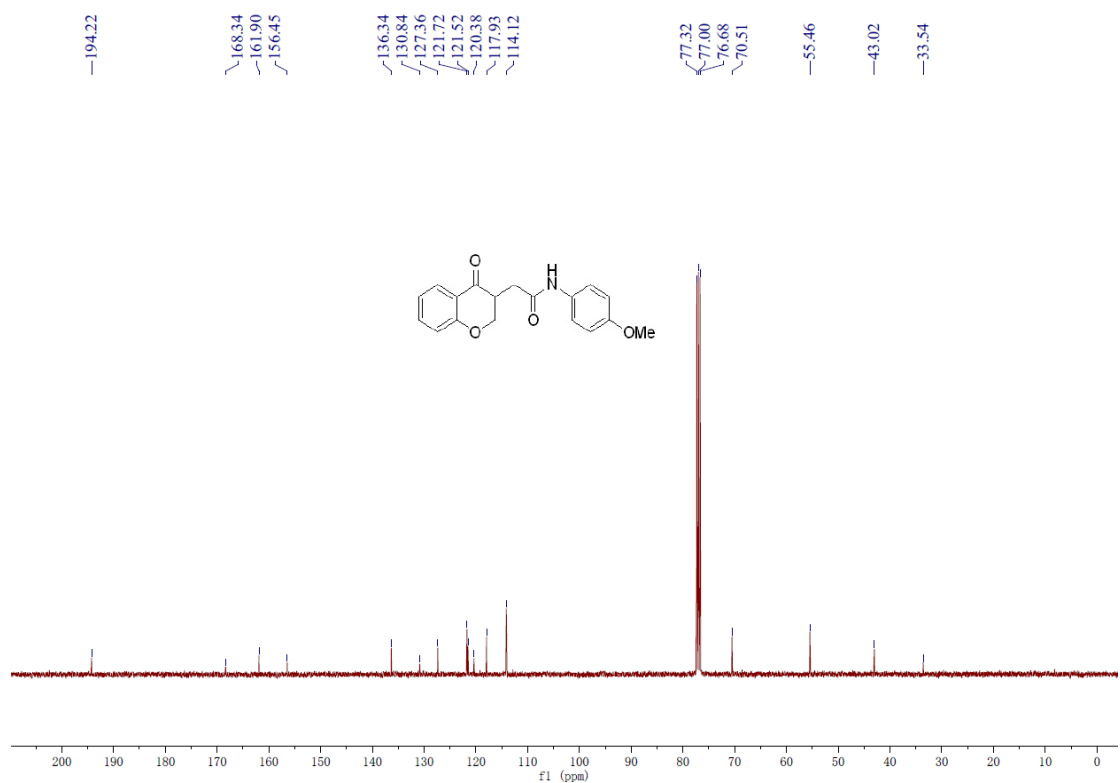

<sup>13</sup>C spectra of **3ac**

***N*-(4-fluorophenyl)-2-(4-oxochroman-3-yl)acetamide (3ad)**

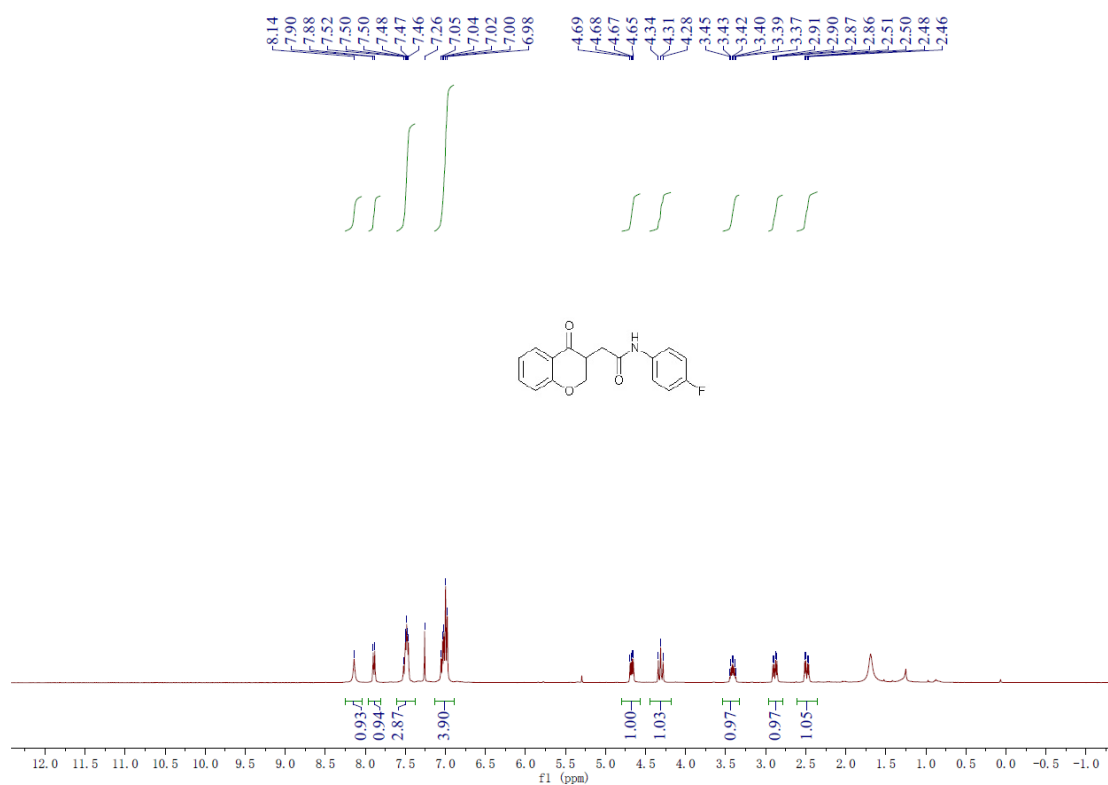

<sup>1</sup>H spectra of 3ad

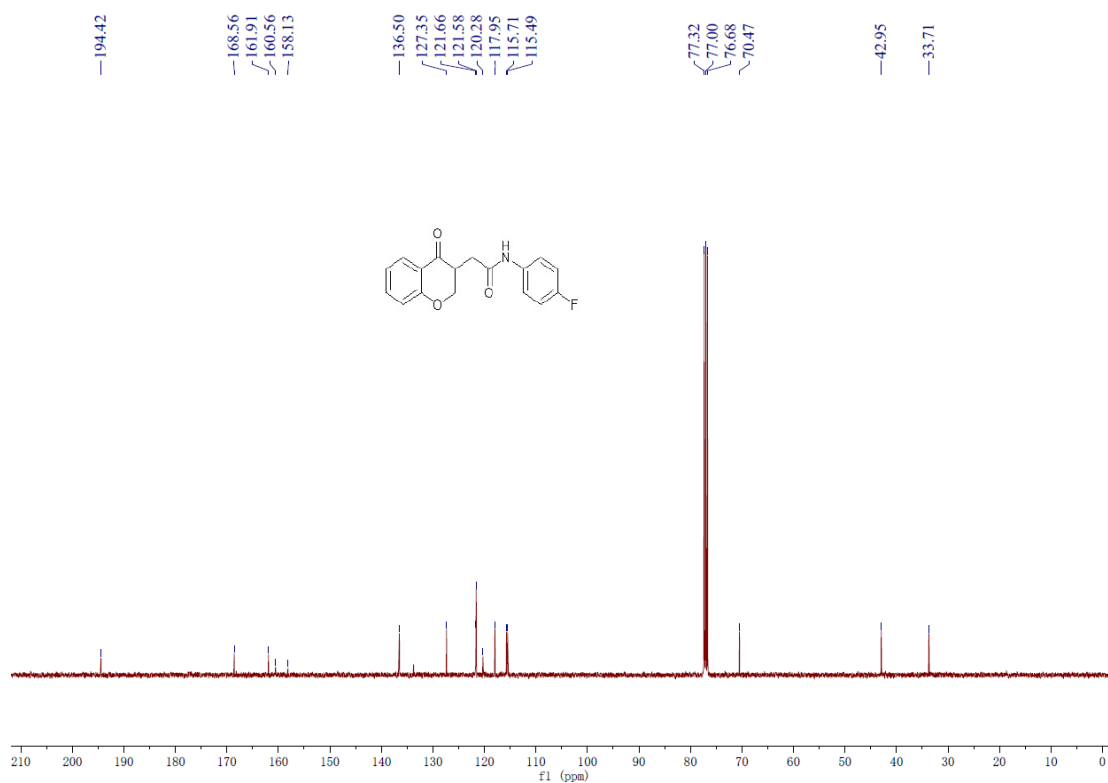

<sup>13</sup>C spectra of 3ad

***N*-(4-chlorophenyl)-2-(4-oxochroman-3-yl)acetamide (3ae)**

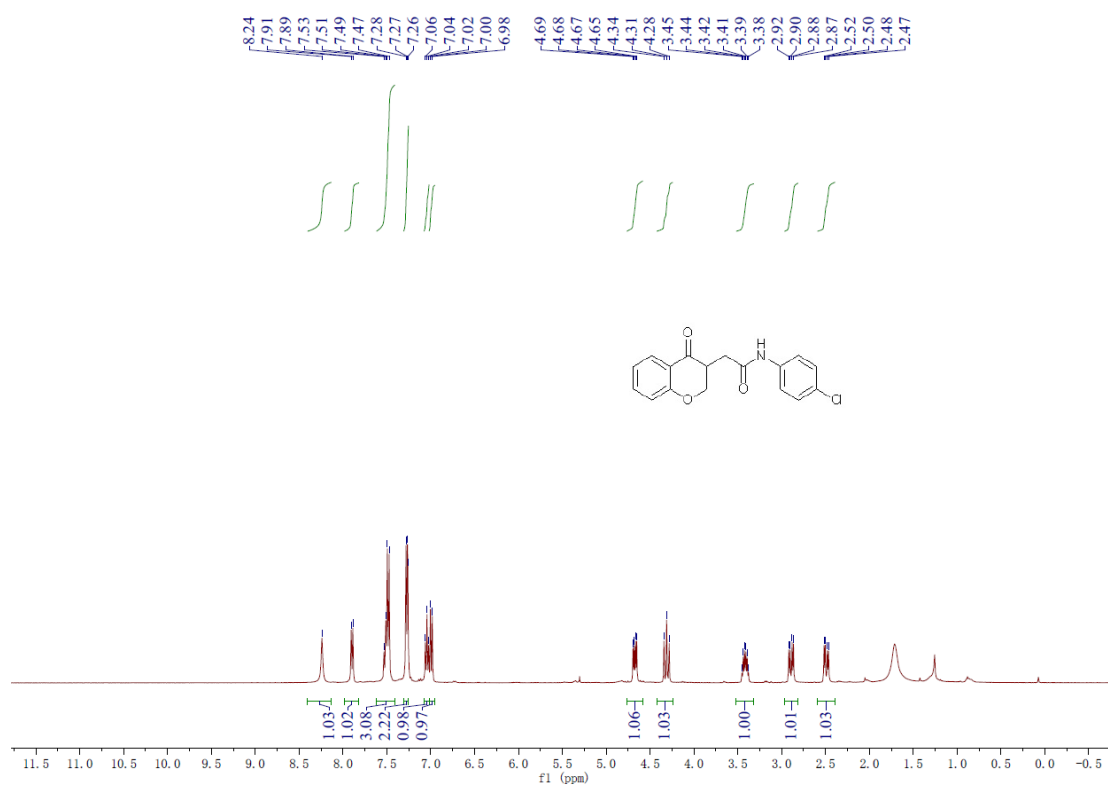

<sup>1</sup>H spectra of 3ae

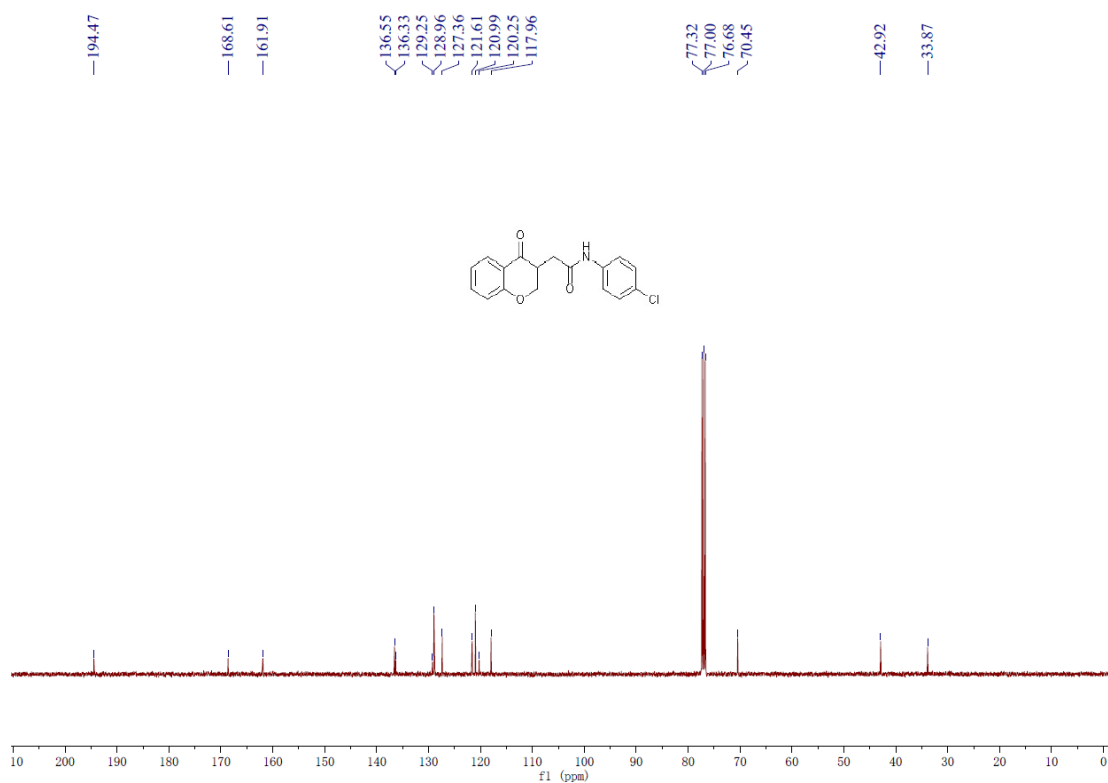

<sup>13</sup>C spectra of 3ae

***N*-(4-bromophenyl)-2-(4-oxochroman-3-yl)acetamide (3af)**

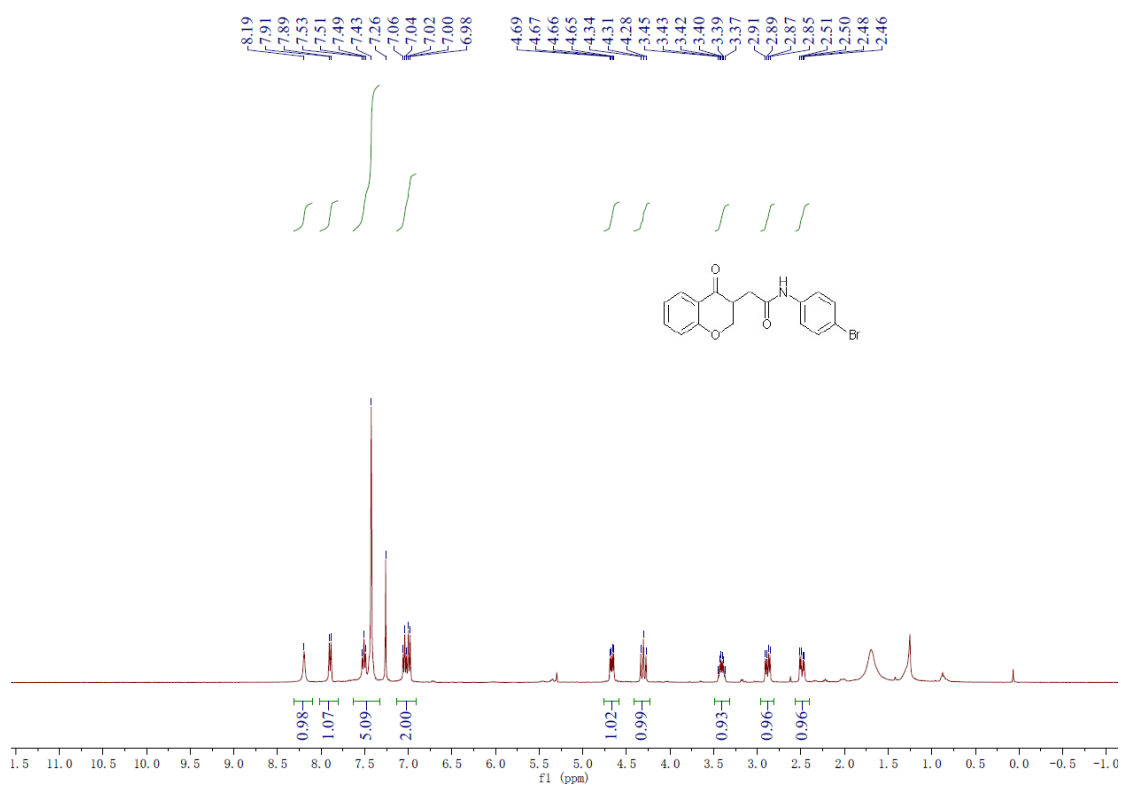

<sup>1</sup>H spectra of **3af**

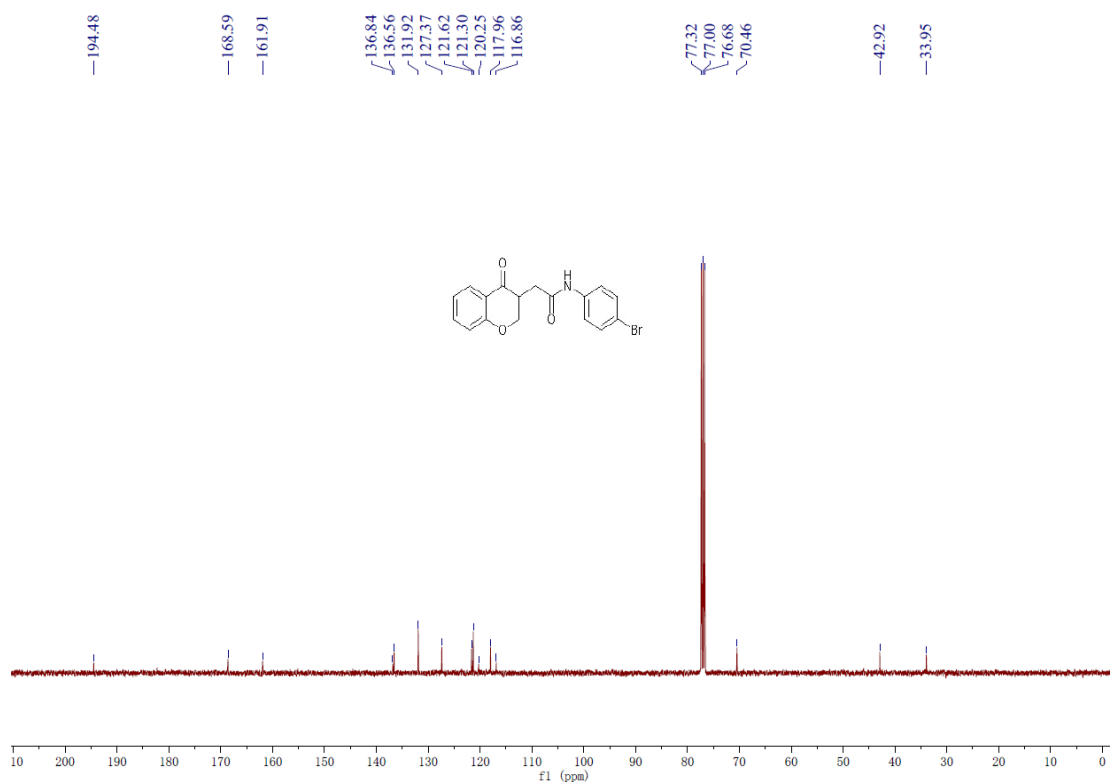

<sup>13</sup>C spectra of **3af**

**2-(4-oxochroman-3-yl)-N-(4-(trifluoromethyl)phenyl)acetamide (3ag)**

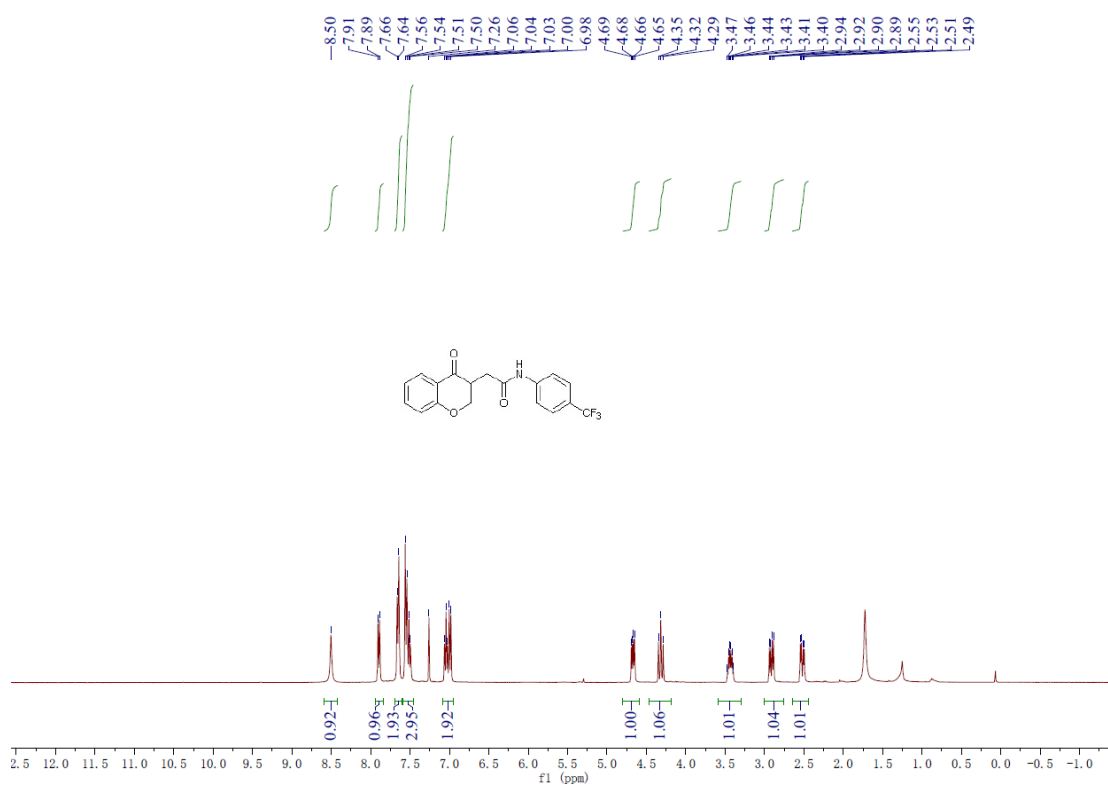

<sup>1</sup>H spectra of 3ag

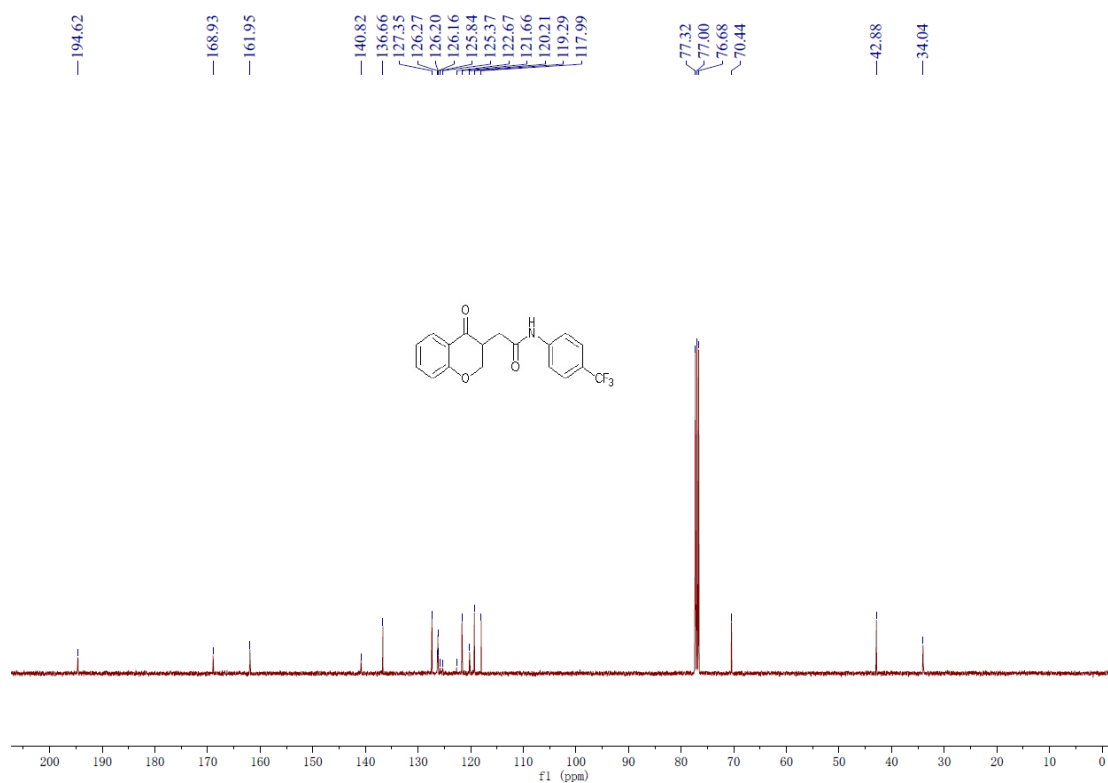

<sup>13</sup>C spectra of 3ag



***N*-(3-bromophenyl)-2-(4-oxochroman-3-yl)acetamide (3ah)**

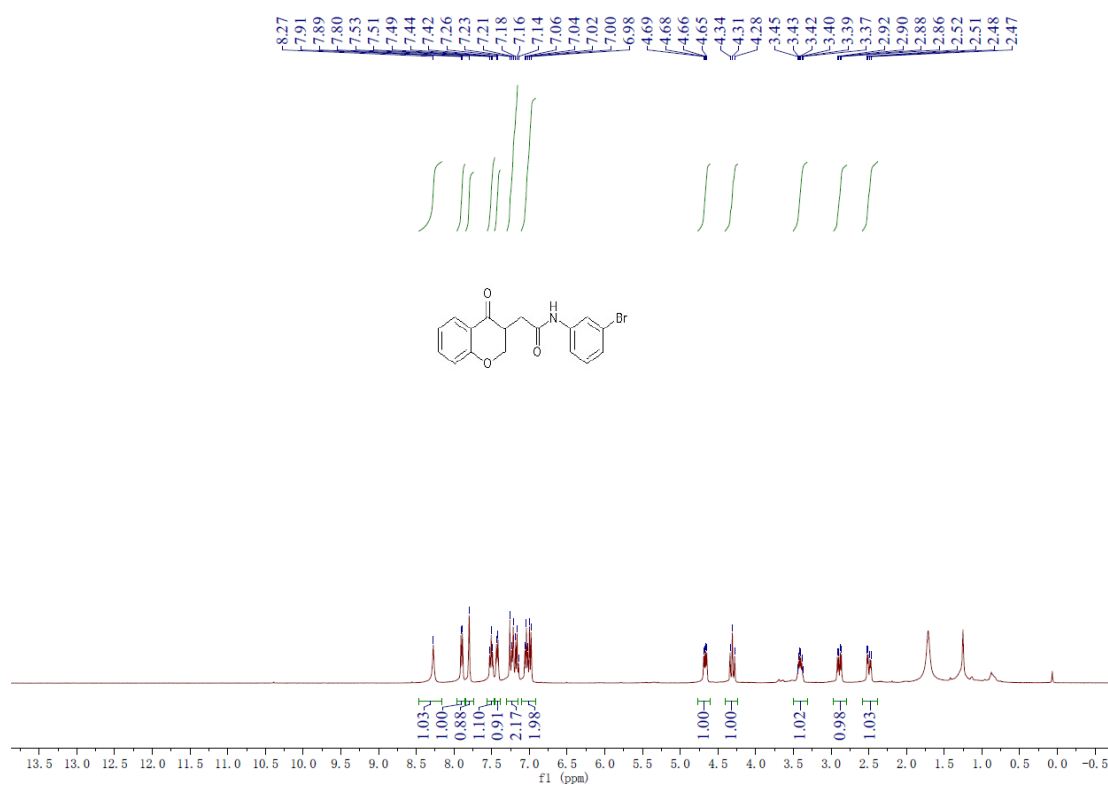

<sup>1</sup>H spectra of **3ah**

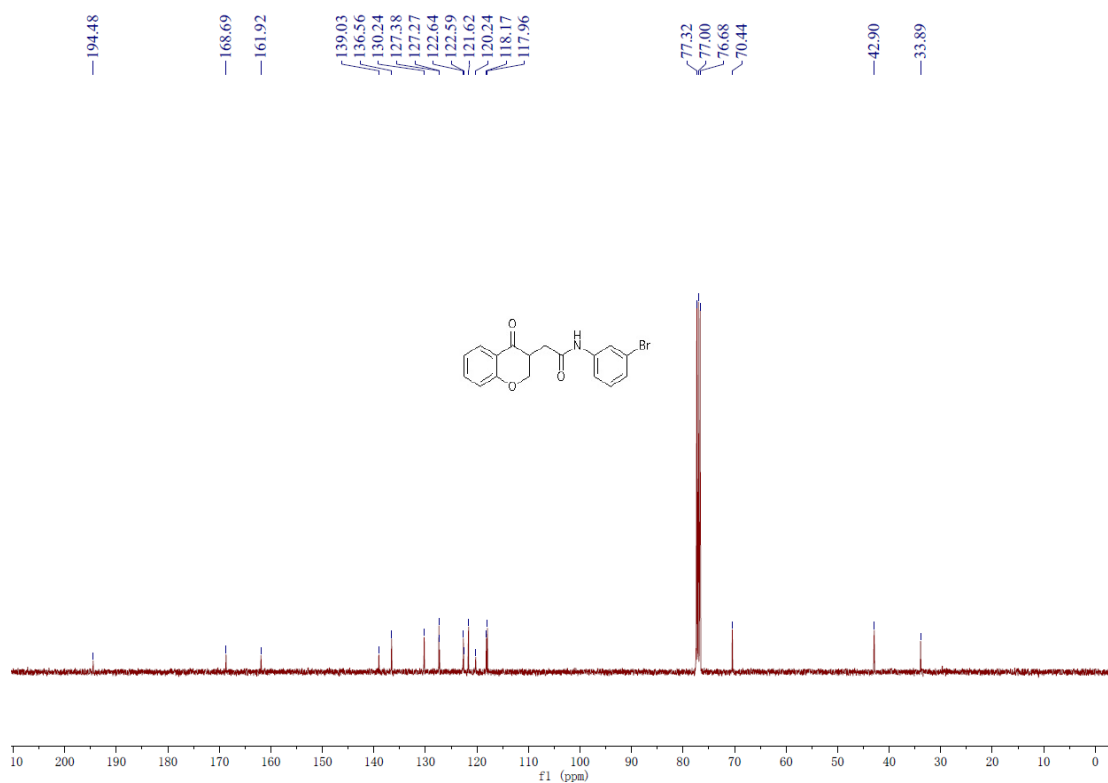

<sup>13</sup>C spectra of **3ah**

**N-benzyl-2-(4-oxochroman-3-yl)acetamide (3ai)**

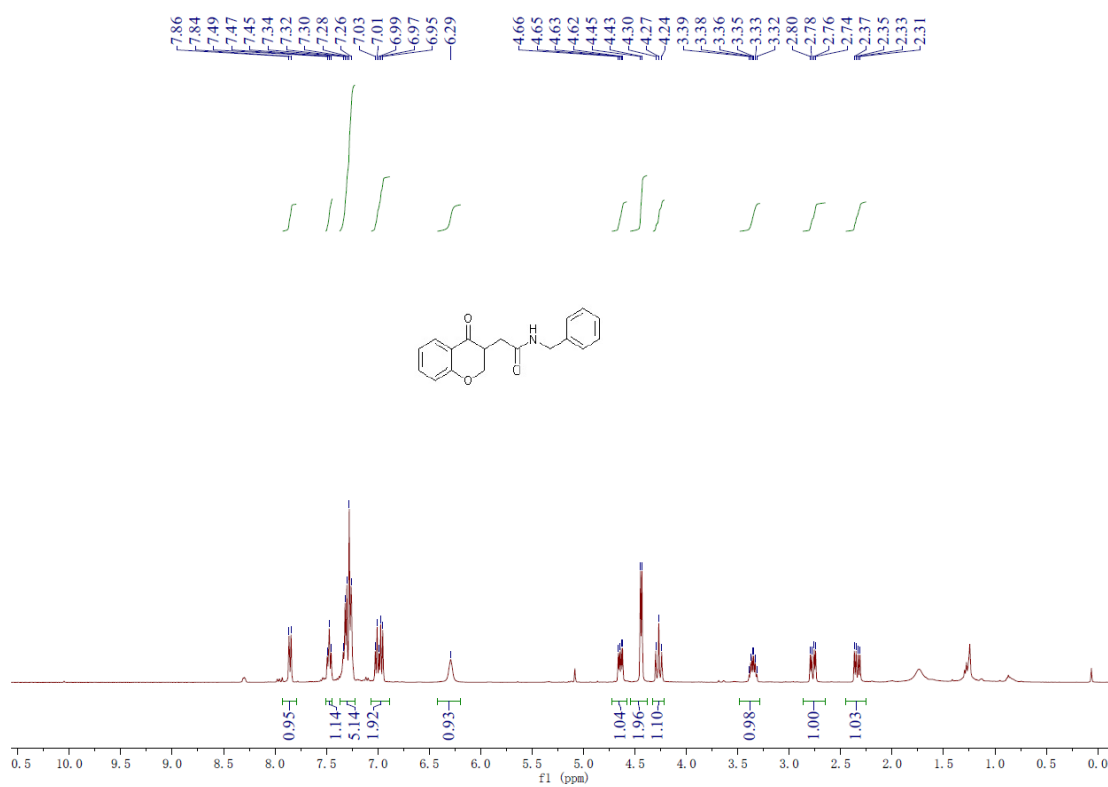

<sup>1</sup>H spectra of **3ai**

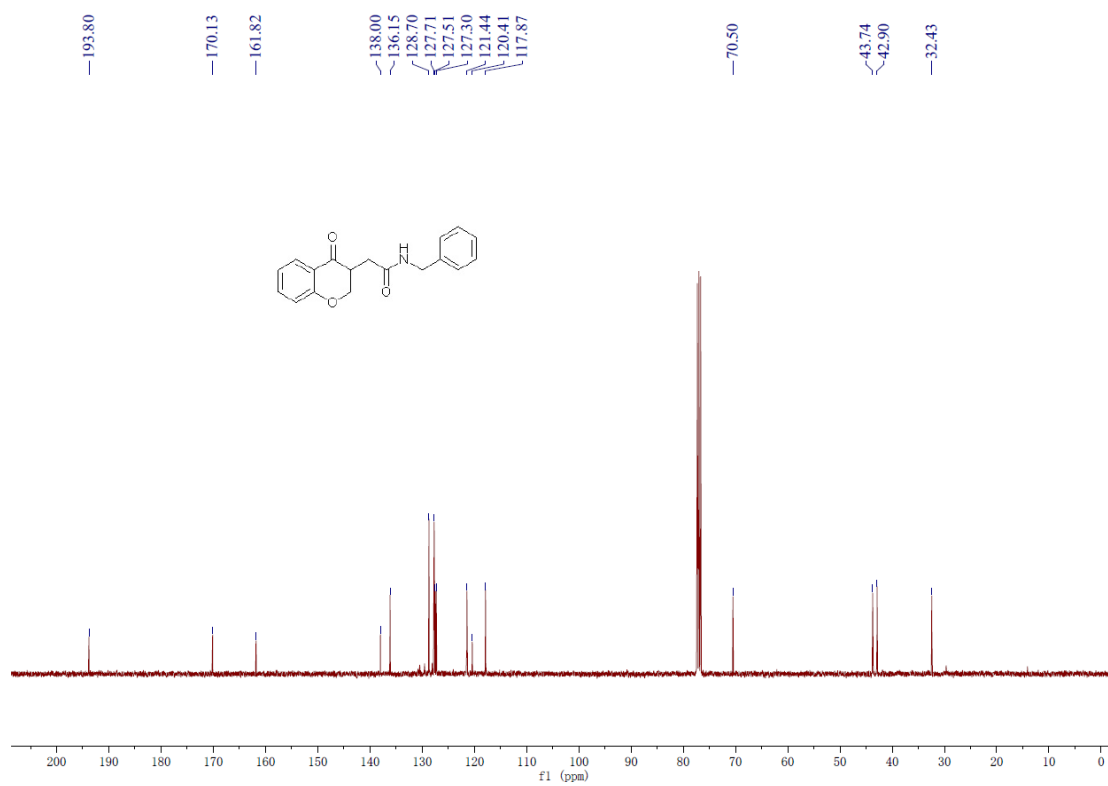

<sup>13</sup>C spectra of **3ai**

***N*-cyclohexyl-2-(4-oxochroman-3-yl)acetamide (3aj)**

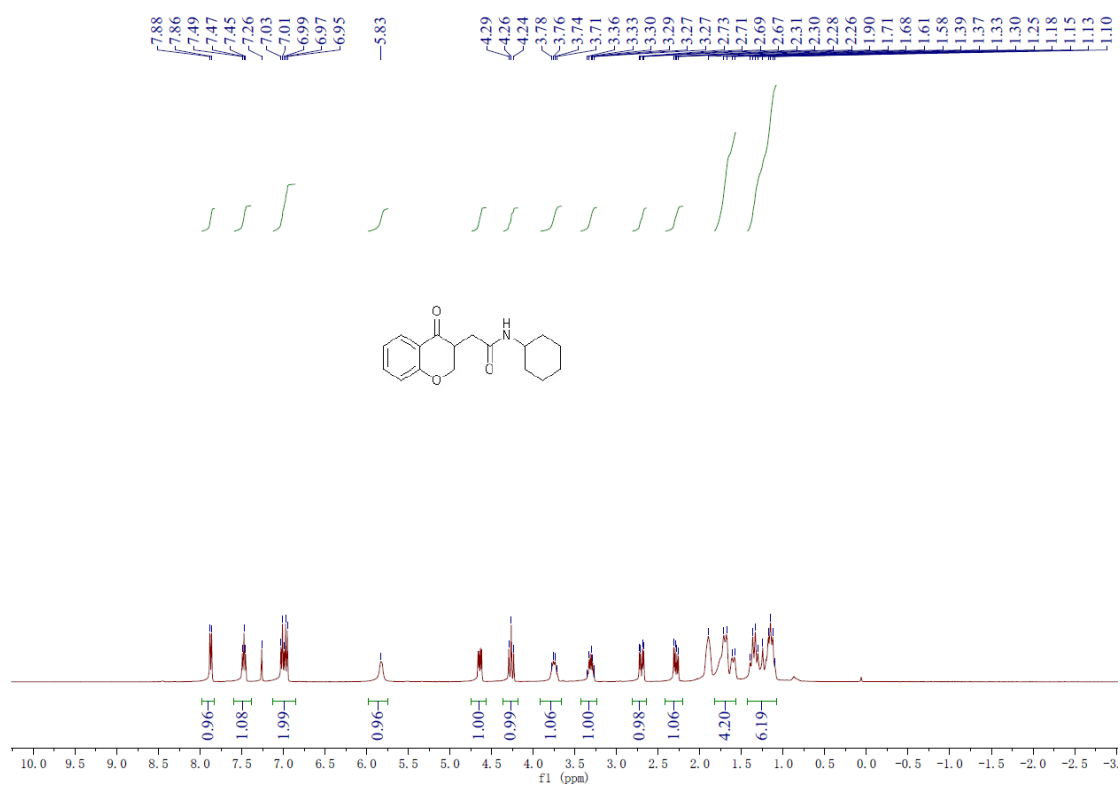

<sup>1</sup>H spectra of **3aj**

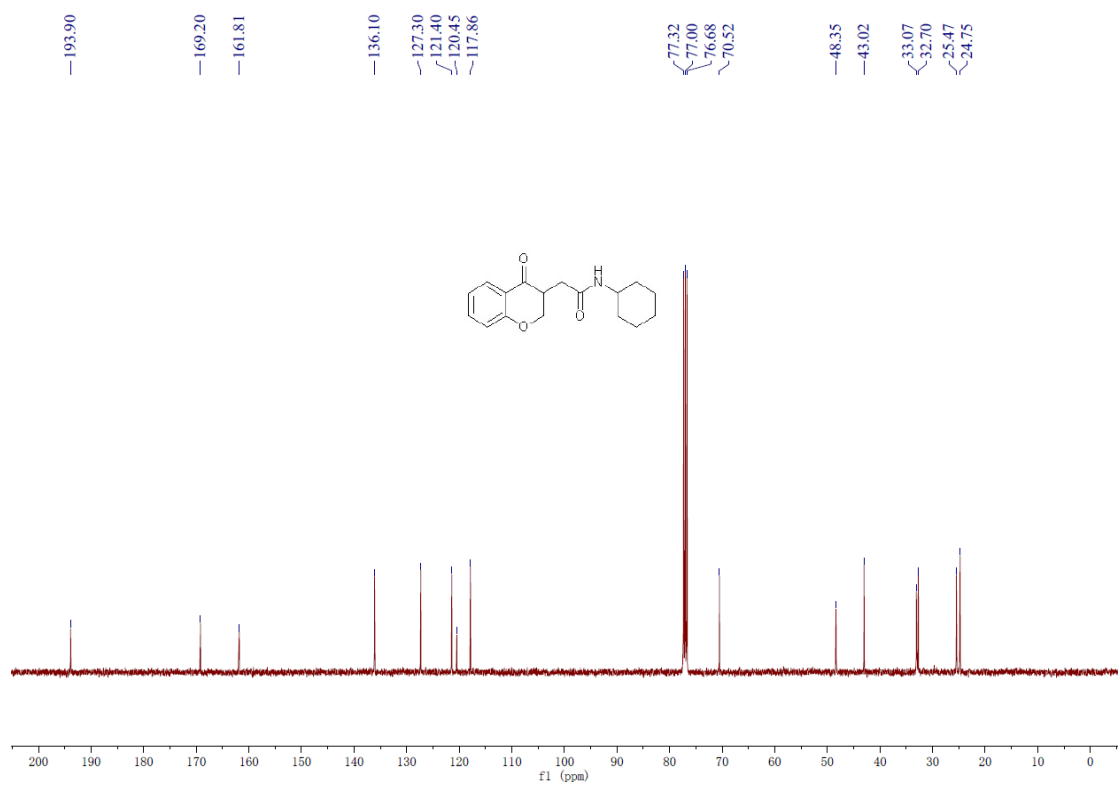

<sup>13</sup>C spectra of **3aj**

**N-cyclopentyl-2-(4-oxochroman-3-yl)acetamide (3ak)**

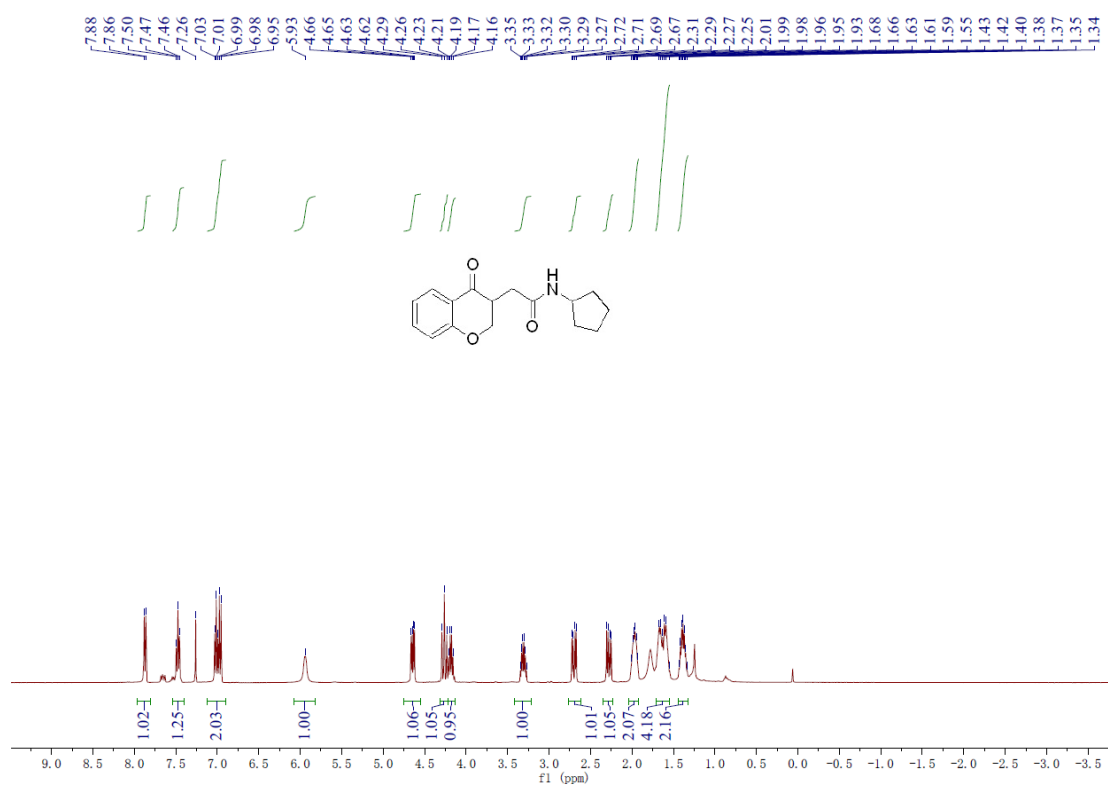

<sup>1</sup>H spectra of 3ak

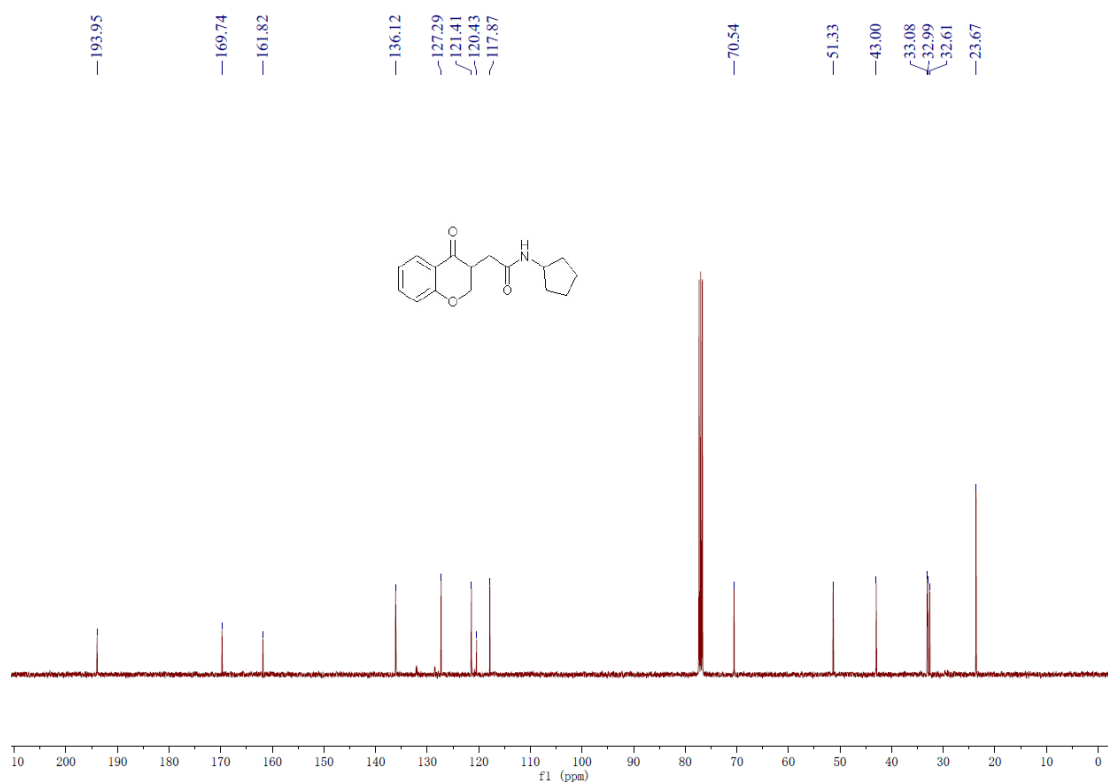

<sup>13</sup>C spectra of 3ak

**N-butyl-2-(4-oxochroman-3-yl)acetamide (3al)**

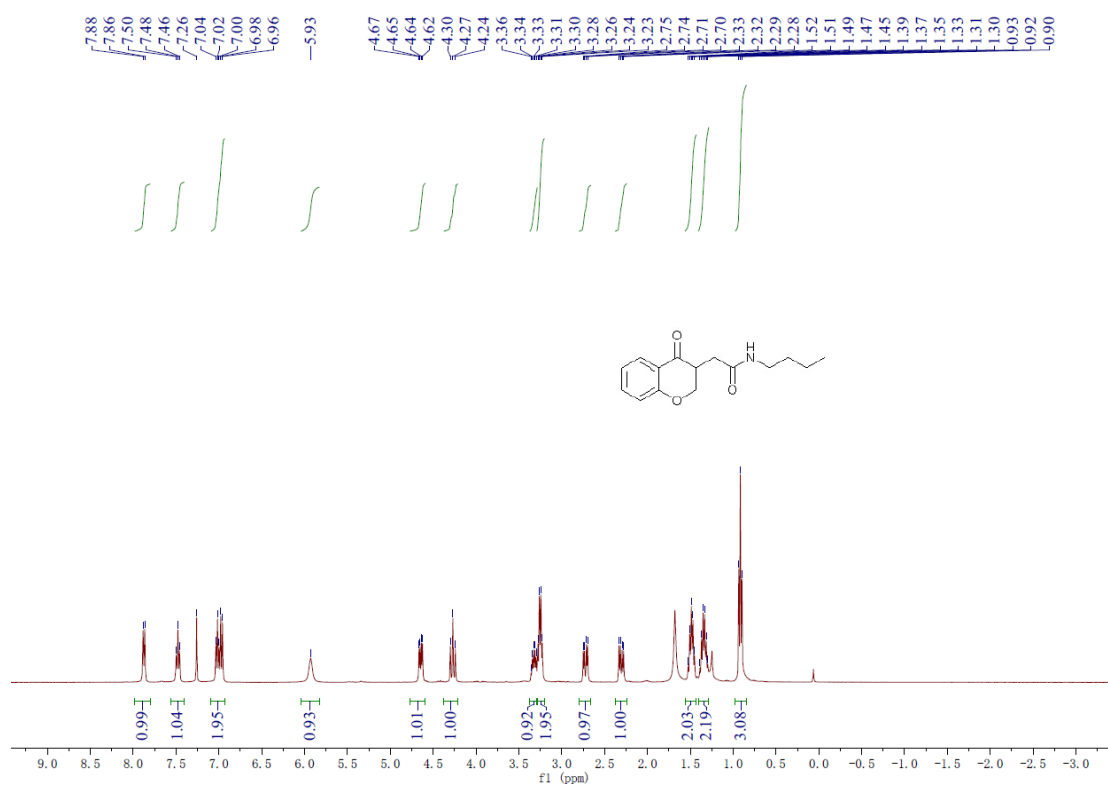

**<sup>1</sup>H spectra of 3al**

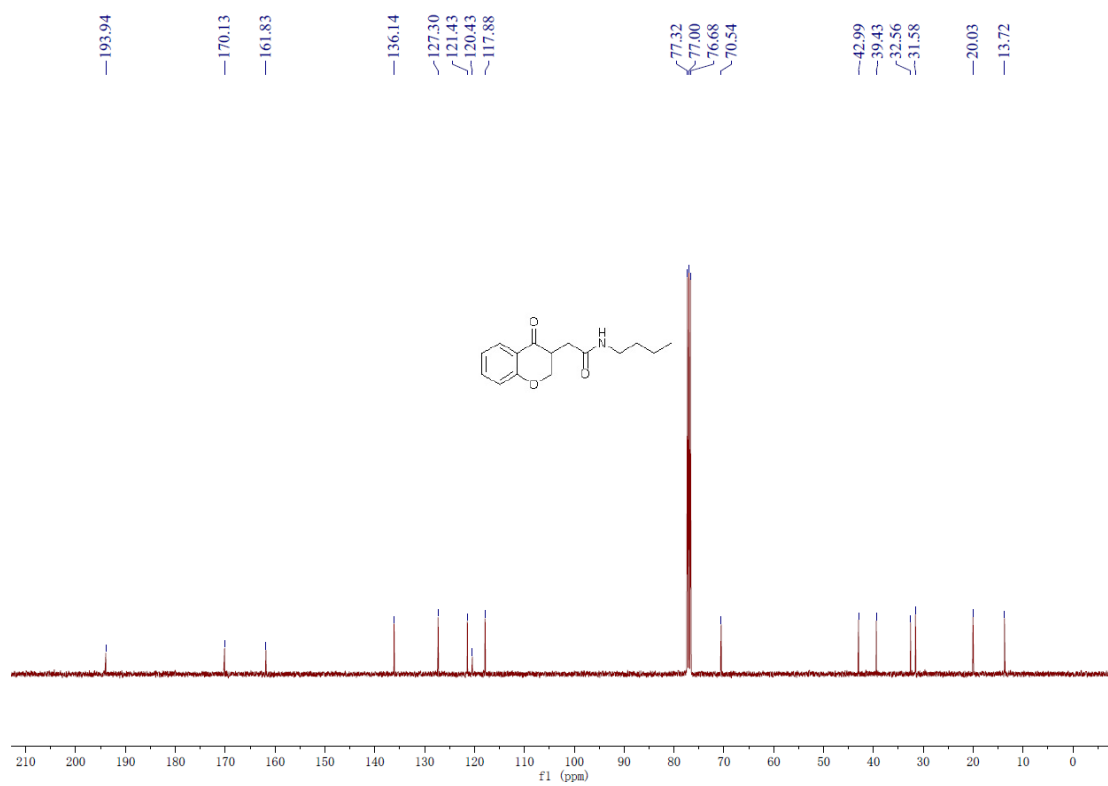

**<sup>13</sup>C spectra of 3al**

### 3-(2-morpholino-2-oxoethyl)chroman-4-one (3am)

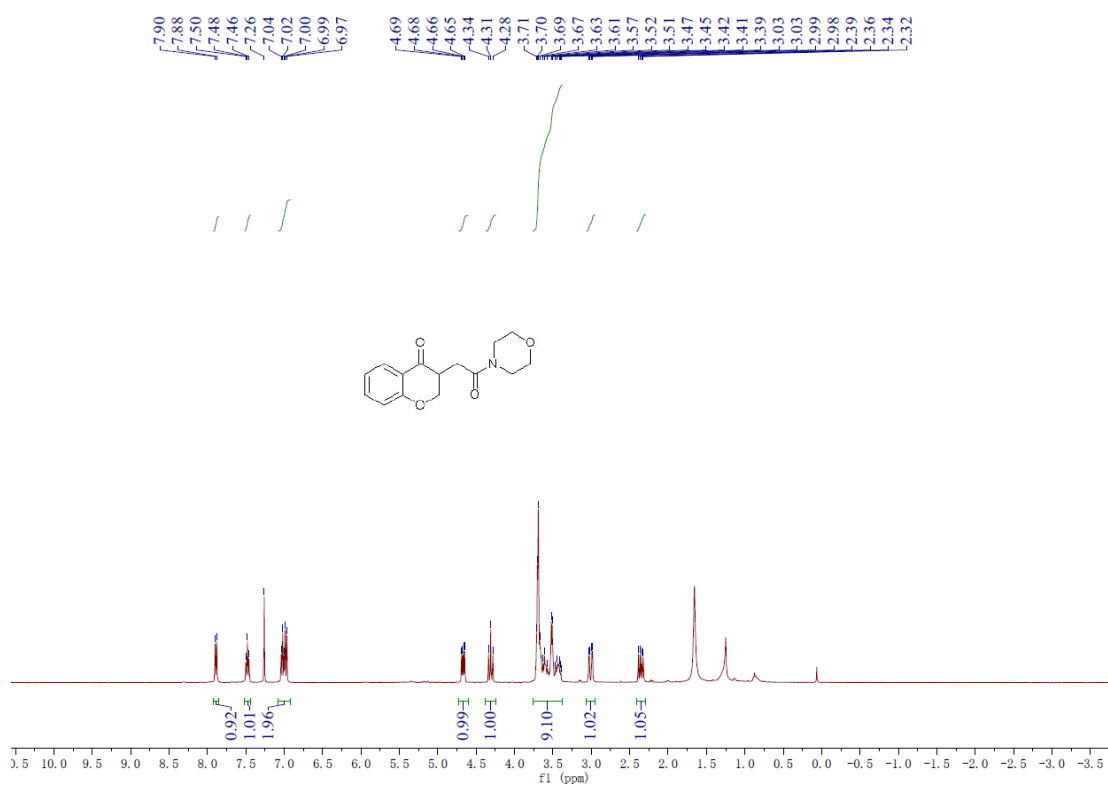

<sup>1</sup>H spectra of 3am

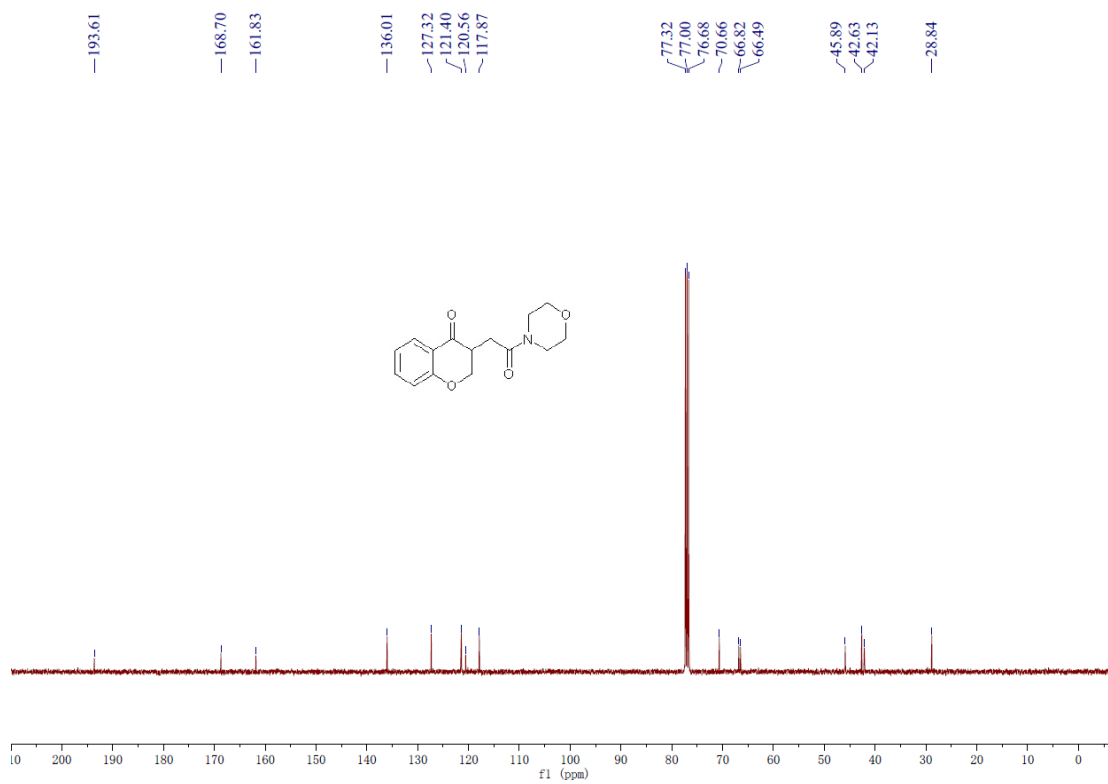

<sup>13</sup>C spectra of 3am

**N-(adamantan-1-yl)-2-(4-oxochroman-3-yl)acetamide (3an)**

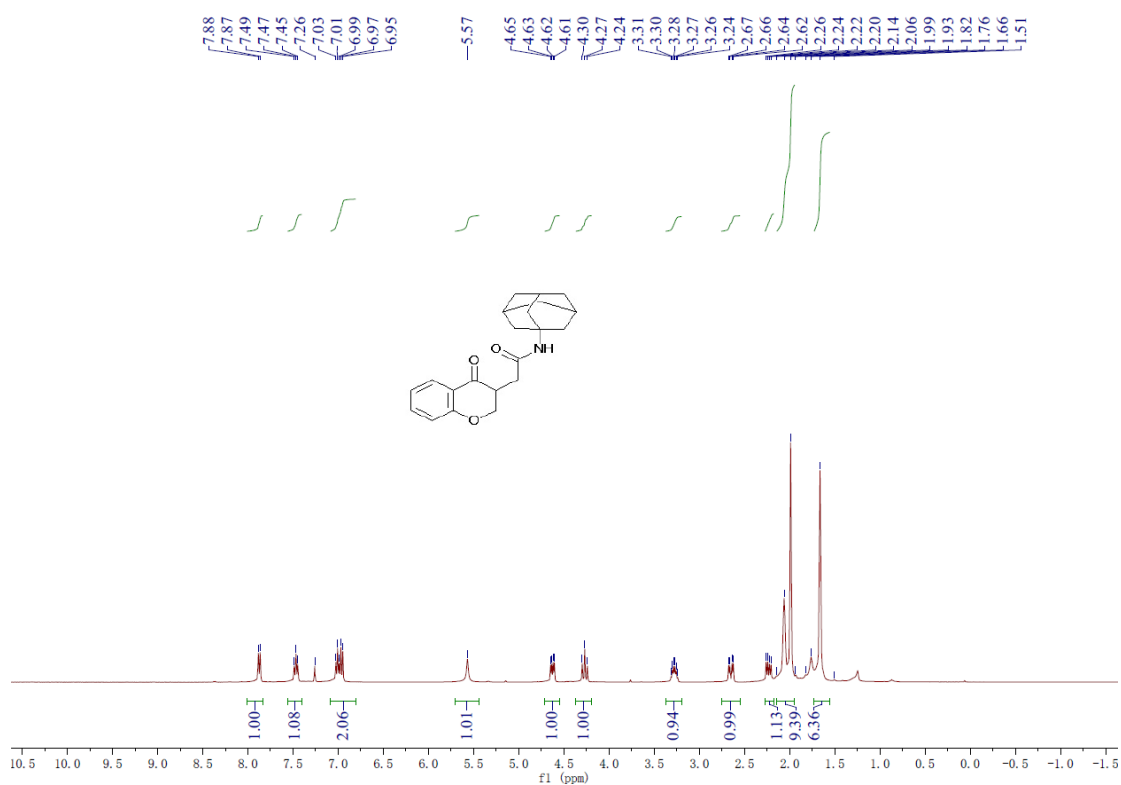

<sup>1</sup>H spectra of **3an**

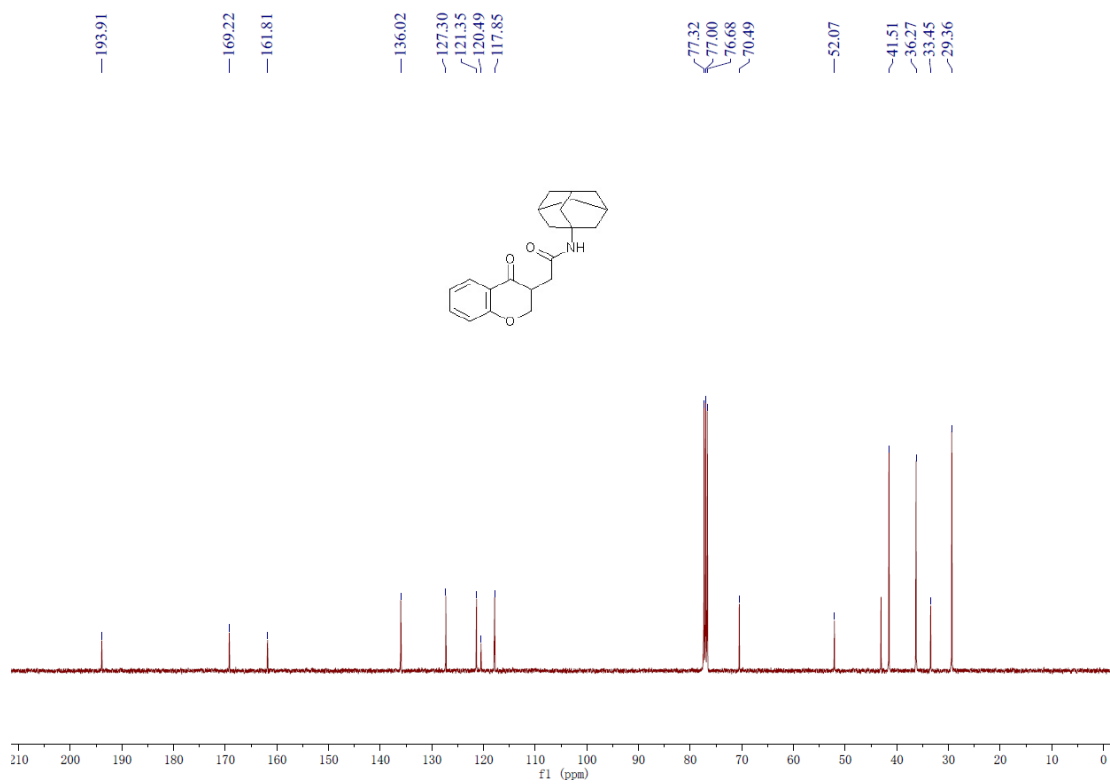

<sup>13</sup>C spectra of **3an**
